# Supplementary material for: Comprehensive analysis of skin growth-related hub genes and microenvironment characterization in a mouse expanded skin model
Source: Front Immunol. 2024 Dec 5;15:1306353. doi: 10.3389/fimmu.2024.1306353 (PMC11655345; doi:10.3389/fimmu.2024.1306353)
Supplement: Supplementary file 3 [file Table2.xlsx]

## Sheet: Ensembl
id_with_url	name	species	feature_type	description
ENSMUSG00000068876	Cgn	Mouse	Gene	cingulin [Source:MGI Symbol;Acc:MGI:1927237] R-MMU-2173791 (Reactome gene record; description: TGF-beta receptor signaling in EMT (epithelial to mesenchymal transition),) is an external reference matched to Gene ENSMUSG00000068876
ENSMUSG00000038235	F11r	Mouse	Gene	F11 receptor [Source:MGI Symbol;Acc:MGI:1321398] R-MMU-2173791 (Reactome gene record; description: TGF-beta receptor signaling in EMT (epithelial to mesenchymal transition),) is an external reference matched to Gene ENSMUSG00000038235
ENSMUSG00000020395	Itk	Mouse	Gene	IL2 inducible T cell kinase [Source:MGI Symbol;Acc:MGI:96621]
ENSMUSG00000023828	Slc22a3	Mouse	Gene	solute carrier family 22 (organic cation transporter), member 3 [Source:MGI Symbol;Acc:MGI:1333817]
ENSMUSG00000005699	Pard6a	Mouse	Gene	par-6 family cell polarity regulator alpha [Source:MGI Symbol;Acc:MGI:1927223] R-MMU-2173791 (Reactome gene record; description: TGF-beta receptor signaling in EMT (epithelial to mesenchymal transition),) is an external reference matched to Gene ENSMUSG00000005699
ENSMUSG00000038780	Smurf1	Mouse	Gene	SMAD specific E3 ubiquitin protein ligase 1 [Source:MGI Symbol;Acc:MGI:1923038] R-MMU-2173791 (Reactome gene record; description: TGF-beta receptor signaling in EMT (epithelial to mesenchymal transition),) is an external reference matched to Gene ENSMUSG00000038780
ENSMUSG00000032050	Rdx	Mouse	Gene	radixin [Source:MGI Symbol;Acc:MGI:97887]
ENSMUSG00000004568	Arhgef18	Mouse	Gene	rho/rac guanine nucleotide exchange factor (GEF) 18 [Source:MGI Symbol;Acc:MGI:2142567] R-MMU-2173791 (Reactome gene record; description: TGF-beta receptor signaling in EMT (epithelial to mesenchymal transition),) is an external reference matched to Gene ENSMUSG00000004568
ENSMUSG00000029053	Prkcz	Mouse	Gene	protein kinase C, zeta [Source:MGI Symbol;Acc:MGI:97602] R-MMU-2173791 (Reactome gene record; description: TGF-beta receptor signaling in EMT (epithelial to mesenchymal transition),) is an external reference matched to Gene ENSMUSG00000029053
ENSMUSG00000032440	Tgfbr2	Mouse	Gene	transforming growth factor, beta receptor II [Source:MGI Symbol;Acc:MGI:98729] R-MMU-2173791 (Reactome gene record; description: TGF-beta receptor signaling in EMT (epithelial to mesenchymal transition),) is an external reference matched to Gene ENSMUSG00000032440
ENSMUSG00000007613	Tgfbr1	Mouse	Gene	transforming growth factor, beta receptor I [Source:MGI Symbol;Acc:MGI:98728] R-MMU-2173791 (Reactome gene record; description: TGF-beta receptor signaling in EMT (epithelial to mesenchymal transition),) is an external reference matched to Gene ENSMUSG00000007613
ENSMUSG00000007815	Rhoa	Mouse	Gene	ras homolog family member A [Source:MGI Symbol;Acc:MGI:1096342] R-MMU-2173791 (Reactome gene record; description: TGF-beta receptor signaling in EMT (epithelial to mesenchymal transition),) is an external reference matched to Gene ENSMUSG00000007815
ENSMUSG00000002603	Tgfb1	Mouse	Gene	transforming growth factor, beta 1 [Source:MGI Symbol;Acc:MGI:98725] R-MMU-2173791 (Reactome gene record; description: TGF-beta receptor signaling in EMT (epithelial to mesenchymal transition),) is an external reference matched to Gene ENSMUSG00000002603
ENSMUSG00000025812	Pard3	Mouse	Gene	par-3 family cell polarity regulator [Source:MGI Symbol;Acc:MGI:2135608] R-MMU-2173791 (Reactome gene record; description: TGF-beta receptor signaling in EMT (epithelial to mesenchymal transition),) is an external reference matched to Gene ENSMUSG00000025812
ENSMUSG00000008348	Ubc	Mouse	Gene	ubiquitin C [Source:MGI Symbol;Acc:MGI:98889] R-MMU-2173791 (Reactome gene record; description: TGF-beta receptor signaling in EMT (epithelial to mesenchymal transition),) is an external reference matched to Gene ENSMUSG00000008348
ENSMUSG00000068240	Gm11808	Mouse	Gene	predicted gene 11808 [Source:MGI Symbol;Acc:MGI:3649356] R-MMU-2173791 (Reactome gene record; description: TGF-beta receptor signaling in EMT (epithelial to mesenchymal transition),) is an external reference matched to Gene ENSMUSG00000068240
ENSMUSG00000019505	Ubb	Mouse	Gene	ubiquitin B [Source:MGI Symbol;Acc:MGI:98888] R-MMU-2173791 (Reactome gene record; description: TGF-beta receptor signaling in EMT (epithelial to mesenchymal transition),) is an external reference matched to Gene ENSMUSG00000019505
ENSMUSG00000020460	Rps27a	Mouse	Gene	ribosomal protein S27A [Source:MGI Symbol;Acc:MGI:1925544] R-MMU-2173791 (Reactome gene record; description: TGF-beta receptor signaling in EMT (epithelial to mesenchymal transition),) is an external reference matched to Gene ENSMUSG00000020460
ENSMUSG00000090137	Uba52	Mouse	Gene	ubiquitin A-52 residue ribosomal protein fusion product 1 [Source:MGI Symbol;Acc:MGI:98887] R-MMU-2173791 (Reactome gene record; description: TGF-beta receptor signaling in EMT (epithelial to mesenchymal transition),) is an external reference matched to Gene ENSMUSG00000090137
MGP_CBAJ_G0027239	Cgn	Mouse	Gene	cingulin [Source:MGI Symbol;Acc:MGI:1927237] R-MMU-2173791 (Reactome record; description: TGF-beta receptor signaling in EMT (epithelial to mesenchymal transition),) is an external reference matched to Translation MGP_CBAJ_P0061859
MGP_AJ_G0027516	Cgn	Mouse	Gene	cingulin [Source:MGI Symbol;Acc:MGI:1927237] R-MMU-2173791 (Reactome record; description: TGF-beta receptor signaling in EMT (epithelial to mesenchymal transition),) is an external reference matched to Translation MGP_AJ_P0062272
MGP_AKRJ_G0027485	Cgn	Mouse	Gene	cingulin [Source:MGI Symbol;Acc:MGI:1927237] R-MMU-2173791 (Reactome record; description: TGF-beta receptor signaling in EMT (epithelial to mesenchymal transition),) is an external reference matched to Translation MGP_AKRJ_P0062215
MGP_129S1SvImJ_G0023146	Slc22a3	Mouse	Gene	solute carrier family 22 (organic cation transporter), member 3 [Source:MGI Symbol;Acc:MGI:1333817]
MGP_AJ_G0023114	Slc22a3	Mouse	Gene	solute carrier family 22 (organic cation transporter), member 3 [Source:MGI Symbol;Acc:MGI:1333817]
MGP_CBAJ_G0022849	Slc22a3	Mouse	Gene	solute carrier family 22 (organic cation transporter), member 3 [Source:MGI Symbol;Acc:MGI:1333817]
MGP_CASTEiJ_G0026711	Cgn	Mouse	Gene	cingulin [Source:MGI Symbol;Acc:MGI:1927237] R-MMU-2173791 (Reactome record; description: TGF-beta receptor signaling in EMT (epithelial to mesenchymal transition),) is an external reference matched to Translation MGP_CASTEiJ_P0062185
MGP_AKRJ_G0023078	Slc22a3	Mouse	Gene	solute carrier family 22 (organic cation transporter), member 3 [Source:MGI Symbol;Acc:MGI:1333817]
MGP_AJ_G0016743	F11r	Mouse	Gene	F11 receptor [Source:MGI Symbol;Acc:MGI:1321398] R-MMU-2173791 (Reactome record; description: TGF-beta receptor signaling in EMT (epithelial to mesenchymal transition),) is an external reference matched to Translation MGP_AJ_P0023463
MGP_LPJ_G0016680	F11r	Mouse	Gene	F11 receptor [Source:MGI Symbol;Acc:MGI:1321398] R-MMU-2173791 (Reactome record; description: TGF-beta receptor signaling in EMT (epithelial to mesenchymal transition),) is an external reference matched to Translation MGP_LPJ_P0023416
MGP_FVBNJ_G0016605	F11r	Mouse	Gene	F11 receptor [Source:MGI Symbol;Acc:MGI:1321398] R-MMU-2173791 (Reactome record; description: TGF-beta receptor signaling in EMT (epithelial to mesenchymal transition),) is an external reference matched to Translation MGP_FVBNJ_P0023324
MGP_DBA2J_G0022982	Slc22a3	Mouse	Gene	solute carrier family 22 (organic cation transporter), member 3 [Source:MGI Symbol;Acc:MGI:1333817]
MGP_FVBNJ_G0022952	Slc22a3	Mouse	Gene	solute carrier family 22 (organic cation transporter), member 3 [Source:MGI Symbol;Acc:MGI:1333817]
MGP_CBAJ_G0016502	F11r	Mouse	Gene	F11 receptor [Source:MGI Symbol;Acc:MGI:1321398] R-MMU-2173791 (Reactome record; description: TGF-beta receptor signaling in EMT (epithelial to mesenchymal transition),) is an external reference matched to Translation MGP_CBAJ_P0023193
MGP_AKRJ_G0016709	F11r	Mouse	Gene	F11 receptor [Source:MGI Symbol;Acc:MGI:1321398] R-MMU-2173791 (Reactome record; description: TGF-beta receptor signaling in EMT (epithelial to mesenchymal transition),) is an external reference matched to Translation MGP_AKRJ_P0023433
MGP_NODShiLtJ_G0016632	F11r	Mouse	Gene	F11 receptor [Source:MGI Symbol;Acc:MGI:1321398] R-MMU-2173791 (Reactome record; description: TGF-beta receptor signaling in EMT (epithelial to mesenchymal transition),) is an external reference matched to Translation MGP_NODShiLtJ_P0023286
MGP_NODShiLtJ_G0022971	Slc22a3	Mouse	Gene	solute carrier family 22 (organic cation transporter), member 3 [Source:MGI Symbol;Acc:MGI:1333817]
MGP_LPJ_G0023054	Slc22a3	Mouse	Gene	solute carrier family 22 (organic cation transporter), member 3 [Source:MGI Symbol;Acc:MGI:1333817]
MGP_NODShiLtJ_G0027377	Cgn	Mouse	Gene	cingulin [Source:MGI Symbol;Acc:MGI:1927237] R-MMU-2173791 (Reactome record; description: TGF-beta receptor signaling in EMT (epithelial to mesenchymal transition),) is an external reference matched to Translation MGP_NODShiLtJ_P0061940
MGP_NZOHlLtJ_G0028032	Cgn	Mouse	Gene	cingulin [Source:MGI Symbol;Acc:MGI:1927237] R-MMU-2173791 (Reactome record; description: TGF-beta receptor signaling in EMT (epithelial to mesenchymal transition),) is an external reference matched to Translation MGP_NZOHlLtJ_P0062893
MGP_NZOHlLtJ_G0023583	Slc22a3	Mouse	Gene	solute carrier family 22 (organic cation transporter), member 3 [Source:MGI Symbol;Acc:MGI:1333817]
MGP_CASTEiJ_G0016108	F11r	Mouse	Gene	F11 receptor [Source:MGI Symbol;Acc:MGI:1321398] R-MMU-2173791 (Reactome record; description: TGF-beta receptor signaling in EMT (epithelial to mesenchymal transition),) is an external reference matched to Translation MGP_CASTEiJ_P0022790
MGP_CASTEiJ_G0022391	Slc22a3	Mouse	Gene	solute carrier family 22 (organic cation transporter), member 3 [Source:MGI Symbol;Acc:MGI:1333817]
MGP_C57BL6NJ_G0023557	Slc22a3	Mouse	Gene	solute carrier family 22 (organic cation transporter), member 3 [Source:MGI Symbol;Acc:MGI:1333817]
MGP_C3HHeJ_G0022877	Slc22a3	Mouse	Gene	solute carrier family 22 (organic cation transporter), member 3 [Source:MGI Symbol;Acc:MGI:1333817]
MGP_BALBcJ_G0023114	Slc22a3	Mouse	Gene	solute carrier family 22 (organic cation transporter), member 3 [Source:MGI Symbol;Acc:MGI:1333817]
MGP_DBA2J_G0016609	F11r	Mouse	Gene	F11 receptor [Source:MGI Symbol;Acc:MGI:1321398] R-MMU-2173791 (Reactome record; description: TGF-beta receptor signaling in EMT (epithelial to mesenchymal transition),) is an external reference matched to Translation MGP_DBA2J_P0023311
MGP_BALBcJ_G0016704	F11r	Mouse	Gene	F11 receptor [Source:MGI Symbol;Acc:MGI:1321398] R-MMU-2173791 (Reactome record; description: TGF-beta receptor signaling in EMT (epithelial to mesenchymal transition),) is an external reference matched to Translation MGP_BALBcJ_P0023442
MGP_WSBEiJ_G0022448	Slc22a3	Mouse	Gene	solute carrier family 22 (organic cation transporter), member 3 [Source:MGI Symbol;Acc:MGI:1333817]
MGP_PWKPhJ_G0022139	Slc22a3	Mouse	Gene	solute carrier family 22 (organic cation transporter), member 3 [Source:MGI Symbol;Acc:MGI:1333817]
MGP_WSBEiJ_G0026793	Cgn	Mouse	Gene	cingulin [Source:MGI Symbol;Acc:MGI:1927237] R-MMU-2173791 (Reactome record; description: TGF-beta receptor signaling in EMT (epithelial to mesenchymal transition),) is an external reference matched to Translation MGP_WSBEiJ_P0061152
MGP_WSBEiJ_G0016170	F11r	Mouse	Gene	F11 receptor [Source:MGI Symbol;Acc:MGI:1321398] R-MMU-2173791 (Reactome record; description: TGF-beta receptor signaling in EMT (epithelial to mesenchymal transition),) is an external reference matched to Translation MGP_WSBEiJ_P0022807
MGP_PWKPhJ_G0015894	F11r	Mouse	Gene	F11 receptor [Source:MGI Symbol;Acc:MGI:1321398] R-MMU-2173791 (Reactome record; description: TGF-beta receptor signaling in EMT (epithelial to mesenchymal transition),) is an external reference matched to Translation MGP_PWKPhJ_P0022515
MGP_NZOHlLtJ_G0017202	F11r	Mouse	Gene	F11 receptor [Source:MGI Symbol;Acc:MGI:1321398] R-MMU-2173791 (Reactome record; description: TGF-beta receptor signaling in EMT (epithelial to mesenchymal transition),) is an external reference matched to Translation MGP_NZOHlLtJ_P0023990
MGP_BALBcJ_G0024236	Tmem173	Mouse	Gene	transmembrane protein 173 [Source:MGI Symbol;Acc:MGI:1919762]
MGP_AJ_G0024236	Tmem173	Mouse	Gene	transmembrane protein 173 [Source:MGI Symbol;Acc:MGI:1919762]
MGP_CBAJ_G0023971	Tmem173	Mouse	Gene	transmembrane protein 173 [Source:MGI Symbol;Acc:MGI:1919762]
MGP_C57BL6NJ_G0024677	Tmem173	Mouse	Gene	transmembrane protein 173 [Source:MGI Symbol;Acc:MGI:1919762]
MGP_C3HHeJ_G0027263	Cgn	Mouse	Gene	cingulin [Source:MGI Symbol;Acc:MGI:1927237] R-MMU-2173791 (Reactome record; description: TGF-beta receptor signaling in EMT (epithelial to mesenchymal transition),) is an external reference matched to Translation MGP_C3HHeJ_P0061890
MGP_C57BL6NJ_G0031271	4930544G11Rik	Mouse	Gene	RIKEN cDNA 4930544G11 gene [Source:MGI Symbol;Acc:MGI:1914903] R-MMU-2173791 (Reactome record; description: TGF-beta receptor signaling in EMT (epithelial to mesenchymal transition),) is an external reference matched to Translation MGP_C57BL6NJ_P0078367
MGP_129S1SvImJ_G0024270	Tmem173	Mouse	Gene	transmembrane protein 173 [Source:MGI Symbol;Acc:MGI:1919762]
MGP_129S1SvImJ_G0027557	Cgn	Mouse	Gene	cingulin [Source:MGI Symbol;Acc:MGI:1927237] R-MMU-2173791 (Reactome record; description: TGF-beta receptor signaling in EMT (epithelial to mesenchymal transition),) is an external reference matched to Translation MGP_129S1SvImJ_P0062241
MGP_C3HHeJ_G0030899	4930544G11Rik	Mouse	Gene	RIKEN cDNA 4930544G11 gene [Source:MGI Symbol;Acc:MGI:1914903] R-MMU-2173791 (Reactome record; description: TGF-beta receptor signaling in EMT (epithelial to mesenchymal transition),) is an external reference matched to Translation MGP_C3HHeJ_P0079404
MGP_C3HHeJ_G0033741	Pard6a	Mouse	Gene	par-6 family cell polarity regulator alpha [Source:MGI Symbol;Acc:MGI:1927223] R-MMU-2173791 (Reactome record; description: TGF-beta receptor signaling in EMT (epithelial to mesenchymal transition),) is an external reference matched to Translation MGP_C3HHeJ_P0089858
MGP_C3HHeJ_G0034487	Rdx	Mouse	Gene	radixin [Source:MGI Symbol;Acc:MGI:97887]
MGP_CASTEiJ_G0029925	4930544G11Rik	Mouse	Gene	RIKEN cDNA 4930544G11 gene [Source:MGI Symbol;Acc:MGI:1914903] R-MMU-2173791 (Reactome record; description: TGF-beta receptor signaling in EMT (epithelial to mesenchymal transition),) is an external reference matched to Translation MGP_CASTEiJ_P0078110
MGP_CASTEiJ_G0033067	Pard6a	Mouse	Gene	par-6 family cell polarity regulator alpha [Source:MGI Symbol;Acc:MGI:1927223] R-MMU-2173791 (Reactome record; description: TGF-beta receptor signaling in EMT (epithelial to mesenchymal transition),) is an external reference matched to Translation MGP_CASTEiJ_P0090402
MGP_C57BL6NJ_G0034549	Pard6a	Mouse	Gene	par-6 family cell polarity regulator alpha [Source:MGI Symbol;Acc:MGI:1927223] R-MMU-2173791 (Reactome record; description: TGF-beta receptor signaling in EMT (epithelial to mesenchymal transition),) is an external reference matched to Translation MGP_C57BL6NJ_P0090808
MGP_CASTEiJ_G0033809	Rdx	Mouse	Gene	radixin [Source:MGI Symbol;Acc:MGI:97887]
MGP_C57BL6NJ_G0035296	Rdx	Mouse	Gene	radixin [Source:MGI Symbol;Acc:MGI:97887]
MGP_CBAJ_G0033714	Pard6a	Mouse	Gene	par-6 family cell polarity regulator alpha [Source:MGI Symbol;Acc:MGI:1927223] R-MMU-2173791 (Reactome record; description: TGF-beta receptor signaling in EMT (epithelial to mesenchymal transition),) is an external reference matched to Translation MGP_CBAJ_P0089788
MGP_CBAJ_G0034458	Rdx	Mouse	Gene	radixin [Source:MGI Symbol;Acc:MGI:97887]
MGP_CBAJ_G0030500	4930544G11Rik	Mouse	Gene	RIKEN cDNA 4930544G11 gene [Source:MGI Symbol;Acc:MGI:1914903] R-MMU-2173791 (Reactome record; description: TGF-beta receptor signaling in EMT (epithelial to mesenchymal transition),) is an external reference matched to Translation MGP_CBAJ_P0077483
MGP_129S1SvImJ_G0030835	4930544G11Rik	Mouse	Gene	RIKEN cDNA 4930544G11 gene [Source:MGI Symbol;Acc:MGI:1914903] R-MMU-2173791 (Reactome record; description: TGF-beta receptor signaling in EMT (epithelial to mesenchymal transition),) is an external reference matched to Translation MGP_129S1SvImJ_P0077889
MGP_AJ_G0030802	4930544G11Rik	Mouse	Gene	RIKEN cDNA 4930544G11 gene [Source:MGI Symbol;Acc:MGI:1914903] R-MMU-2173791 (Reactome record; description: TGF-beta receptor signaling in EMT (epithelial to mesenchymal transition),) is an external reference matched to Translation MGP_AJ_P0077965
MGP_AJ_G0034036	Pard6a	Mouse	Gene	par-6 family cell polarity regulator alpha [Source:MGI Symbol;Acc:MGI:1927223] R-MMU-2173791 (Reactome record; description: TGF-beta receptor signaling in EMT (epithelial to mesenchymal transition),) is an external reference matched to Translation MGP_AJ_P0090359
MGP_AJ_G0034785	Rdx	Mouse	Gene	radixin [Source:MGI Symbol;Acc:MGI:97887]
MGP_BALBcJ_G0034029	Pard6a	Mouse	Gene	par-6 family cell polarity regulator alpha [Source:MGI Symbol;Acc:MGI:1927223] R-MMU-2173791 (Reactome record; description: TGF-beta receptor signaling in EMT (epithelial to mesenchymal transition),) is an external reference matched to Translation MGP_BALBcJ_P0090284
MGP_BALBcJ_G0030813	4930544G11Rik	Mouse	Gene	RIKEN cDNA 4930544G11 gene [Source:MGI Symbol;Acc:MGI:1914903] R-MMU-2173791 (Reactome record; description: TGF-beta receptor signaling in EMT (epithelial to mesenchymal transition),) is an external reference matched to Translation MGP_BALBcJ_P0077909
MGP_BALBcJ_G0018133	Itk	Mouse	Gene	IL2 inducible T cell kinase [Source:MGI Symbol;Acc:MGI:96621]
MGP_AKRJ_G0024204	Tmem173	Mouse	Gene	transmembrane protein 173 [Source:MGI Symbol;Acc:MGI:1919762]
MGP_C3HHeJ_G0016527	F11r	Mouse	Gene	F11 receptor [Source:MGI Symbol;Acc:MGI:1321398] R-MMU-2173791 (Reactome record; description: TGF-beta receptor signaling in EMT (epithelial to mesenchymal transition),) is an external reference matched to Translation MGP_C3HHeJ_P0023244
MGP_BALBcJ_G0034777	Rdx	Mouse	Gene	radixin [Source:MGI Symbol;Acc:MGI:97887]
MGP_C57BL6NJ_G0017165	F11r	Mouse	Gene	F11 receptor [Source:MGI Symbol;Acc:MGI:1321398] R-MMU-2173791 (Reactome record; description: TGF-beta receptor signaling in EMT (epithelial to mesenchymal transition),) is an external reference matched to Translation MGP_C57BL6NJ_P0023949
MGP_129S1SvImJ_G0034055	Pard6a	Mouse	Gene	par-6 family cell polarity regulator alpha [Source:MGI Symbol;Acc:MGI:1927223] R-MMU-2173791 (Reactome record; description: TGF-beta receptor signaling in EMT (epithelial to mesenchymal transition),) is an external reference matched to Translation MGP_129S1SvImJ_P0090273
MGP_AKRJ_G0030730	4930544G11Rik	Mouse	Gene	RIKEN cDNA 4930544G11 gene [Source:MGI Symbol;Acc:MGI:1914903] R-MMU-2173791 (Reactome record; description: TGF-beta receptor signaling in EMT (epithelial to mesenchymal transition),) is an external reference matched to Translation MGP_AKRJ_P0077878
MGP_AKRJ_G0033962	Pard6a	Mouse	Gene	par-6 family cell polarity regulator alpha [Source:MGI Symbol;Acc:MGI:1927223] R-MMU-2173791 (Reactome record; description: TGF-beta receptor signaling in EMT (epithelial to mesenchymal transition),) is an external reference matched to Translation MGP_AKRJ_P0090290
MGP_AJ_G0018164	Itk	Mouse	Gene	IL2 inducible T cell kinase [Source:MGI Symbol;Acc:MGI:96621]
MGP_129S1SvImJ_G0016763	F11r	Mouse	Gene	F11 receptor [Source:MGI Symbol;Acc:MGI:1321398] R-MMU-2173791 (Reactome record; description: TGF-beta receptor signaling in EMT (epithelial to mesenchymal transition),) is an external reference matched to Translation MGP_129S1SvImJ_P0023498
MGP_LPJ_G0018101	Itk	Mouse	Gene	IL2 inducible T cell kinase [Source:MGI Symbol;Acc:MGI:96621]
MGP_FVBNJ_G0018023	Itk	Mouse	Gene	IL2 inducible T cell kinase [Source:MGI Symbol;Acc:MGI:96621]
MGP_DBA2J_G0024103	Tmem173	Mouse	Gene	transmembrane protein 173 [Source:MGI Symbol;Acc:MGI:1919762]
MGP_FVBNJ_G0024070	Tmem173	Mouse	Gene	transmembrane protein 173 [Source:MGI Symbol;Acc:MGI:1919762]
MGP_DBA2J_G0030652	4930544G11Rik	Mouse	Gene	RIKEN cDNA 4930544G11 gene [Source:MGI Symbol;Acc:MGI:1914903] R-MMU-2173791 (Reactome record; description: TGF-beta receptor signaling in EMT (epithelial to mesenchymal transition),) is an external reference matched to Translation MGP_DBA2J_P0077645
MGP_CBAJ_G0017919	Itk	Mouse	Gene	IL2 inducible T cell kinase [Source:MGI Symbol;Acc:MGI:96621]
MGP_NODShiLtJ_G0018047	Itk	Mouse	Gene	IL2 inducible T cell kinase [Source:MGI Symbol;Acc:MGI:96621]
MGP_NODShiLtJ_G0024098	Tmem173	Mouse	Gene	transmembrane protein 173 [Source:MGI Symbol;Acc:MGI:1919762]
MGP_NZOHlLtJ_G0031297	4930544G11Rik	Mouse	Gene	RIKEN cDNA 4930544G11 gene [Source:MGI Symbol;Acc:MGI:1914903] R-MMU-2173791 (Reactome record; description: TGF-beta receptor signaling in EMT (epithelial to mesenchymal transition),) is an external reference matched to Translation MGP_NZOHlLtJ_P0078616
MGP_NZOHlLtJ_G0034567	Pard6a	Mouse	Gene	par-6 family cell polarity regulator alpha [Source:MGI Symbol;Acc:MGI:1927223] R-MMU-2173791 (Reactome record; description: TGF-beta receptor signaling in EMT (epithelial to mesenchymal transition),) is an external reference matched to Translation MGP_NZOHlLtJ_P0091116
MGP_NZOHlLtJ_G0035318	Rdx	Mouse	Gene	radixin [Source:MGI Symbol;Acc:MGI:97887]
MGP_PWKPhJ_G0029640	4930544G11Rik	Mouse	Gene	RIKEN cDNA 4930544G11 gene [Source:MGI Symbol;Acc:MGI:1914903] R-MMU-2173791 (Reactome record; description: TGF-beta receptor signaling in EMT (epithelial to mesenchymal transition),) is an external reference matched to Translation MGP_PWKPhJ_P0077529
MGP_PWKPhJ_G0032768	Pard6a	Mouse	Gene	par-6 family cell polarity regulator alpha [Source:MGI Symbol;Acc:MGI:1927223] R-MMU-2173791 (Reactome record; description: TGF-beta receptor signaling in EMT (epithelial to mesenchymal transition),) is an external reference matched to Translation MGP_PWKPhJ_P0089833
MGP_PWKPhJ_G0033513	Rdx	Mouse	Gene	radixin [Source:MGI Symbol;Acc:MGI:97887]
MGP_NZOHlLtJ_G0024726	Tmem173	Mouse	Gene	transmembrane protein 173 [Source:MGI Symbol;Acc:MGI:1919762]
MGP_NODShiLtJ_G0033858	Pard6a	Mouse	Gene	par-6 family cell polarity regulator alpha [Source:MGI Symbol;Acc:MGI:1927223] R-MMU-2173791 (Reactome record; description: TGF-beta receptor signaling in EMT (epithelial to mesenchymal transition),) is an external reference matched to Translation MGP_NODShiLtJ_P0089858
MGP_LPJ_G0024185	Tmem173	Mouse	Gene	transmembrane protein 173 [Source:MGI Symbol;Acc:MGI:1919762]
MGP_NODShiLtJ_G0030640	4930544G11Rik	Mouse	Gene	RIKEN cDNA 4930544G11 gene [Source:MGI Symbol;Acc:MGI:1914903] R-MMU-2173791 (Reactome record; description: TGF-beta receptor signaling in EMT (epithelial to mesenchymal transition),) is an external reference matched to Translation MGP_NODShiLtJ_P0077534
MGP_NODShiLtJ_G0034602	Rdx	Mouse	Gene	radixin [Source:MGI Symbol;Acc:MGI:97887]
MGP_LPJ_G0030736	4930544G11Rik	Mouse	Gene	RIKEN cDNA 4930544G11 gene [Source:MGI Symbol;Acc:MGI:1914903] R-MMU-2173791 (Reactome record; description: TGF-beta receptor signaling in EMT (epithelial to mesenchymal transition),) is an external reference matched to Translation MGP_LPJ_P0077680
MGP_LPJ_G0033960	Pard6a	Mouse	Gene	par-6 family cell polarity regulator alpha [Source:MGI Symbol;Acc:MGI:1927223] R-MMU-2173791 (Reactome record; description: TGF-beta receptor signaling in EMT (epithelial to mesenchymal transition),) is an external reference matched to Translation MGP_LPJ_P0090032
MGP_LPJ_G0034699	Rdx	Mouse	Gene	radixin [Source:MGI Symbol;Acc:MGI:97887]
MGP_CASTEiJ_G0017510	Itk	Mouse	Gene	IL2 inducible T cell kinase [Source:MGI Symbol;Acc:MGI:96621]
MGP_CASTEiJ_G0023478	Tmem173	Mouse	Gene	transmembrane protein 173 [Source:MGI Symbol;Acc:MGI:1919762]
MGP_C3HHeJ_G0024003	Tmem173	Mouse	Gene	transmembrane protein 173 [Source:MGI Symbol;Acc:MGI:1919762]
MGP_NZOHlLtJ_G0018626	Itk	Mouse	Gene	IL2 inducible T cell kinase [Source:MGI Symbol;Acc:MGI:96621]
MGP_DBA2J_G0033869	Pard6a	Mouse	Gene	par-6 family cell polarity regulator alpha [Source:MGI Symbol;Acc:MGI:1927223] R-MMU-2173791 (Reactome record; description: TGF-beta receptor signaling in EMT (epithelial to mesenchymal transition),) is an external reference matched to Translation MGP_DBA2J_P0089995
MGP_DBA2J_G0034617	Rdx	Mouse	Gene	radixin [Source:MGI Symbol;Acc:MGI:97887]
MGP_FVBNJ_G0033815	Pard6a	Mouse	Gene	par-6 family cell polarity regulator alpha [Source:MGI Symbol;Acc:MGI:1927223] R-MMU-2173791 (Reactome record; description: TGF-beta receptor signaling in EMT (epithelial to mesenchymal transition),) is an external reference matched to Translation MGP_FVBNJ_P0089835
MGP_FVBNJ_G0030605	4930544G11Rik	Mouse	Gene	RIKEN cDNA 4930544G11 gene [Source:MGI Symbol;Acc:MGI:1914903] R-MMU-2173791 (Reactome record; description: TGF-beta receptor signaling in EMT (epithelial to mesenchymal transition),) is an external reference matched to Translation MGP_FVBNJ_P0077537
MGP_FVBNJ_G0034559	Rdx	Mouse	Gene	radixin [Source:MGI Symbol;Acc:MGI:97887]
MGP_DBA2J_G0018029	Itk	Mouse	Gene	IL2 inducible T cell kinase [Source:MGI Symbol;Acc:MGI:96621]
MGP_AKRJ_G0034713	Rdx	Mouse	Gene	radixin [Source:MGI Symbol;Acc:MGI:97887]
MGP_AKRJ_G0018129	Itk	Mouse	Gene	IL2 inducible T cell kinase [Source:MGI Symbol;Acc:MGI:96621]
MGP_WSBEiJ_G0023541	Tmem173	Mouse	Gene	transmembrane protein 173 [Source:MGI Symbol;Acc:MGI:1919762]
MGP_PWKPhJ_G0023222	Tmem173	Mouse	Gene	transmembrane protein 173 [Source:MGI Symbol;Acc:MGI:1919762]
MGP_WSBEiJ_G0030007	4930544G11Rik	Mouse	Gene	RIKEN cDNA 4930544G11 gene [Source:MGI Symbol;Acc:MGI:1914903] R-MMU-2173791 (Reactome record; description: TGF-beta receptor signaling in EMT (epithelial to mesenchymal transition),) is an external reference matched to Translation MGP_WSBEiJ_P0076644
MGP_WSBEiJ_G0033183	Pard6a	Mouse	Gene	par-6 family cell polarity regulator alpha [Source:MGI Symbol;Acc:MGI:1927223] R-MMU-2173791 (Reactome record; description: TGF-beta receptor signaling in EMT (epithelial to mesenchymal transition),) is an external reference matched to Translation MGP_WSBEiJ_P0088895
MGP_WSBEiJ_G0033921	Rdx	Mouse	Gene	radixin [Source:MGI Symbol;Acc:MGI:97887]
MGP_WSBEiJ_G0017560	Itk	Mouse	Gene	IL2 inducible T cell kinase [Source:MGI Symbol;Acc:MGI:96621]
MGP_PWKPhJ_G0017290	Itk	Mouse	Gene	IL2 inducible T cell kinase [Source:MGI Symbol;Acc:MGI:96621]
MGP_C3HHeJ_G0035084	Tgfbr2	Mouse	Gene	transforming growth factor, beta receptor II [Source:MGI Symbol;Acc:MGI:98729] R-MMU-2173791 (Reactome record; description: TGF-beta receptor signaling in EMT (epithelial to mesenchymal transition),) is an external reference matched to Translation MGP_C3HHeJ_P0094686
MGP_BALBcJ_G0035376	Tgfbr2	Mouse	Gene	transforming growth factor, beta receptor II [Source:MGI Symbol;Acc:MGI:98729] R-MMU-2173791 (Reactome record; description: TGF-beta receptor signaling in EMT (epithelial to mesenchymal transition),) is an external reference matched to Translation MGP_BALBcJ_P0095122
MGP_CASTEiJ_G0032321	Arhgef18	Mouse	Gene	rho/rac guanine nucleotide exchange factor (GEF) 18 [Source:MGI Symbol;Acc:MGI:2142567] R-MMU-2173791 (Reactome record; description: TGF-beta receptor signaling in EMT (epithelial to mesenchymal transition),) is an external reference matched to Translation MGP_CASTEiJ_P0088060
MGP_CASTEiJ_G0034389	Tgfbr2	Mouse	Gene	transforming growth factor, beta receptor II [Source:MGI Symbol;Acc:MGI:98729] R-MMU-2173791 (Reactome record; description: TGF-beta receptor signaling in EMT (epithelial to mesenchymal transition),) is an external reference matched to Translation MGP_CASTEiJ_P0095291
MGP_C57BL6NJ_G0035899	Tgfbr2	Mouse	Gene	transforming growth factor, beta receptor II [Source:MGI Symbol;Acc:MGI:98729] R-MMU-2173791 (Reactome record; description: TGF-beta receptor signaling in EMT (epithelial to mesenchymal transition),) is an external reference matched to Translation MGP_C57BL6NJ_P0095632
MGP_CBAJ_G0032971	Arhgef18	Mouse	Gene	rho/rac guanine nucleotide exchange factor (GEF) 18 [Source:MGI Symbol;Acc:MGI:2142567] R-MMU-2173791 (Reactome record; description: TGF-beta receptor signaling in EMT (epithelial to mesenchymal transition),) is an external reference matched to Translation MGP_CBAJ_P0087480
MGP_CBAJ_G0035051	Tgfbr2	Mouse	Gene	transforming growth factor, beta receptor II [Source:MGI Symbol;Acc:MGI:98729] R-MMU-2173791 (Reactome record; description: TGF-beta receptor signaling in EMT (epithelial to mesenchymal transition),) is an external reference matched to Translation MGP_CBAJ_P0094608
MGP_BALBcJ_G0033284	Arhgef18	Mouse	Gene	rho/rac guanine nucleotide exchange factor (GEF) 18 [Source:MGI Symbol;Acc:MGI:2142567] R-MMU-2173791 (Reactome record; description: TGF-beta receptor signaling in EMT (epithelial to mesenchymal transition),) is an external reference matched to Translation MGP_BALBcJ_P0087972
MGP_AJ_G0033284	Arhgef18	Mouse	Gene	rho/rac guanine nucleotide exchange factor (GEF) 18 [Source:MGI Symbol;Acc:MGI:2142567] R-MMU-2173791 (Reactome record; description: TGF-beta receptor signaling in EMT (epithelial to mesenchymal transition),) is an external reference matched to Translation MGP_AJ_P0088019
MGP_AJ_G0035380	Tgfbr2	Mouse	Gene	transforming growth factor, beta receptor II [Source:MGI Symbol;Acc:MGI:98729] R-MMU-2173791 (Reactome record; description: TGF-beta receptor signaling in EMT (epithelial to mesenchymal transition),) is an external reference matched to Translation MGP_AJ_P0095198
MGP_C3HHeJ_G0017947	Itk	Mouse	Gene	IL2 inducible T cell kinase [Source:MGI Symbol;Acc:MGI:96621]
MGP_C57BL6NJ_G0018587	Itk	Mouse	Gene	IL2 inducible T cell kinase [Source:MGI Symbol;Acc:MGI:96621]
MGP_129S1SvImJ_G0034804	Rdx	Mouse	Gene	radixin [Source:MGI Symbol;Acc:MGI:97887]
MGP_129S1SvImJ_G0035400	Tgfbr2	Mouse	Gene	transforming growth factor, beta receptor II [Source:MGI Symbol;Acc:MGI:98729] R-MMU-2173791 (Reactome record; description: TGF-beta receptor signaling in EMT (epithelial to mesenchymal transition),) is an external reference matched to Translation MGP_129S1SvImJ_P0095101
MGP_AKRJ_G0033215	Arhgef18	Mouse	Gene	rho/rac guanine nucleotide exchange factor (GEF) 18 [Source:MGI Symbol;Acc:MGI:2142567] R-MMU-2173791 (Reactome record; description: TGF-beta receptor signaling in EMT (epithelial to mesenchymal transition),) is an external reference matched to Translation MGP_AKRJ_P0087954
MGP_129S1SvImJ_G0018192	Itk	Mouse	Gene	IL2 inducible T cell kinase [Source:MGI Symbol;Acc:MGI:96621]
MGP_NZOHlLtJ_G0033812	Arhgef18	Mouse	Gene	rho/rac guanine nucleotide exchange factor (GEF) 18 [Source:MGI Symbol;Acc:MGI:2142567] R-MMU-2173791 (Reactome record; description: TGF-beta receptor signaling in EMT (epithelial to mesenchymal transition),) is an external reference matched to Translation MGP_NZOHlLtJ_P0088771
MGP_NZOHlLtJ_G0035918	Tgfbr2	Mouse	Gene	transforming growth factor, beta receptor II [Source:MGI Symbol;Acc:MGI:98729] R-MMU-2173791 (Reactome record; description: TGF-beta receptor signaling in EMT (epithelial to mesenchymal transition),) is an external reference matched to Translation MGP_NZOHlLtJ_P0095965
MGP_PWKPhJ_G0032031	Arhgef18	Mouse	Gene	rho/rac guanine nucleotide exchange factor (GEF) 18 [Source:MGI Symbol;Acc:MGI:2142567] R-MMU-2173791 (Reactome record; description: TGF-beta receptor signaling in EMT (epithelial to mesenchymal transition),) is an external reference matched to Translation MGP_PWKPhJ_P0087465
MGP_PWKPhJ_G0034095	Tgfbr2	Mouse	Gene	transforming growth factor, beta receptor II [Source:MGI Symbol;Acc:MGI:98729] R-MMU-2173791 (Reactome record; description: TGF-beta receptor signaling in EMT (epithelial to mesenchymal transition),) is an external reference matched to Translation MGP_PWKPhJ_P0094720
MGP_WSBEiJ_G0034509	Tgfbr2	Mouse	Gene	transforming growth factor, beta receptor II [Source:MGI Symbol;Acc:MGI:98729] R-MMU-2173791 (Reactome record; description: TGF-beta receptor signaling in EMT (epithelial to mesenchymal transition),) is an external reference matched to Translation MGP_WSBEiJ_P0093671
MGP_NODShiLtJ_G0033107	Arhgef18	Mouse	Gene	rho/rac guanine nucleotide exchange factor (GEF) 18 [Source:MGI Symbol;Acc:MGI:2142567] R-MMU-2173791 (Reactome record; description: TGF-beta receptor signaling in EMT (epithelial to mesenchymal transition),) is an external reference matched to Translation MGP_NODShiLtJ_P0087553
MGP_NODShiLtJ_G0035198	Tgfbr2	Mouse	Gene	transforming growth factor, beta receptor II [Source:MGI Symbol;Acc:MGI:98729] R-MMU-2173791 (Reactome record; description: TGF-beta receptor signaling in EMT (epithelial to mesenchymal transition),) is an external reference matched to Translation MGP_NODShiLtJ_P0094642
MGP_LPJ_G0033217	Arhgef18	Mouse	Gene	rho/rac guanine nucleotide exchange factor (GEF) 18 [Source:MGI Symbol;Acc:MGI:2142567] R-MMU-2173791 (Reactome record; description: TGF-beta receptor signaling in EMT (epithelial to mesenchymal transition),) is an external reference matched to Translation MGP_LPJ_P0087705
MGP_LPJ_G0035289	Tgfbr2	Mouse	Gene	transforming growth factor, beta receptor II [Source:MGI Symbol;Acc:MGI:98729] R-MMU-2173791 (Reactome record; description: TGF-beta receptor signaling in EMT (epithelial to mesenchymal transition),) is an external reference matched to Translation MGP_LPJ_P0094834
MGP_DBA2J_G0033125	Arhgef18	Mouse	Gene	rho/rac guanine nucleotide exchange factor (GEF) 18 [Source:MGI Symbol;Acc:MGI:2142567] R-MMU-2173791 (Reactome record; description: TGF-beta receptor signaling in EMT (epithelial to mesenchymal transition),) is an external reference matched to Translation MGP_DBA2J_P0087678
MGP_DBA2J_G0035210	Tgfbr2	Mouse	Gene	transforming growth factor, beta receptor II [Source:MGI Symbol;Acc:MGI:98729] R-MMU-2173791 (Reactome record; description: TGF-beta receptor signaling in EMT (epithelial to mesenchymal transition),) is an external reference matched to Translation MGP_DBA2J_P0094812
MGP_FVBNJ_G0033072	Arhgef18	Mouse	Gene	rho/rac guanine nucleotide exchange factor (GEF) 18 [Source:MGI Symbol;Acc:MGI:2142567] R-MMU-2173791 (Reactome record; description: TGF-beta receptor signaling in EMT (epithelial to mesenchymal transition),) is an external reference matched to Translation MGP_FVBNJ_P0087514
MGP_FVBNJ_G0030125	Smurf1	Mouse	Gene	SMAD specific E3 ubiquitin protein ligase 1 [Source:MGI Symbol;Acc:MGI:1923038] R-MMU-2173791 (Reactome record; description: TGF-beta receptor signaling in EMT (epithelial to mesenchymal transition),) is an external reference matched to Translation MGP_FVBNJ_P0075432
MGP_FVBNJ_G0035157	Tgfbr2	Mouse	Gene	transforming growth factor, beta receptor II [Source:MGI Symbol;Acc:MGI:98729] R-MMU-2173791 (Reactome record; description: TGF-beta receptor signaling in EMT (epithelial to mesenchymal transition),) is an external reference matched to Translation MGP_FVBNJ_P0094670
MGP_AKRJ_G0035313	Tgfbr2	Mouse	Gene	transforming growth factor, beta receptor II [Source:MGI Symbol;Acc:MGI:98729] R-MMU-2173791 (Reactome record; description: TGF-beta receptor signaling in EMT (epithelial to mesenchymal transition),) is an external reference matched to Translation MGP_AKRJ_P0095148
MGP_CASTEiJ_G0027406	Tgfbr1	Mouse	Gene	transforming growth factor, beta receptor I [Source:MGI Symbol;Acc:MGI:98728] R-MMU-2173791 (Reactome record; description: TGF-beta receptor signaling in EMT (epithelial to mesenchymal transition),) is an external reference matched to Translation MGP_CASTEiJ_P0065617
MGP_CASTEiJ_G0028326	Prkcz	Mouse	Gene	protein kinase C, zeta [Source:MGI Symbol;Acc:MGI:97602] R-MMU-2173791 (Reactome record; description: TGF-beta receptor signaling in EMT (epithelial to mesenchymal transition),) is an external reference matched to Translation MGP_CASTEiJ_P0069898
MGP_CBAJ_G0027933	Tgfbr1	Mouse	Gene	transforming growth factor, beta receptor I [Source:MGI Symbol;Acc:MGI:98728] R-MMU-2173791 (Reactome record; description: TGF-beta receptor signaling in EMT (epithelial to mesenchymal transition),) is an external reference matched to Translation MGP_CBAJ_P0065245
MGP_CBAJ_G0028875	Prkcz	Mouse	Gene	protein kinase C, zeta [Source:MGI Symbol;Acc:MGI:97602] R-MMU-2173791 (Reactome record; description: TGF-beta receptor signaling in EMT (epithelial to mesenchymal transition),) is an external reference matched to Translation MGP_CBAJ_P0069324
MGP_C3HHeJ_G0027967	Tgfbr1	Mouse	Gene	transforming growth factor, beta receptor I [Source:MGI Symbol;Acc:MGI:98728] R-MMU-2173791 (Reactome record; description: TGF-beta receptor signaling in EMT (epithelial to mesenchymal transition),) is an external reference matched to Translation MGP_C3HHeJ_P0065298
MGP_C3HHeJ_G0028913	Prkcz	Mouse	Gene	protein kinase C, zeta [Source:MGI Symbol;Acc:MGI:97602] R-MMU-2173791 (Reactome record; description: TGF-beta receptor signaling in EMT (epithelial to mesenchymal transition),) is an external reference matched to Translation MGP_C3HHeJ_P0069387
MGP_C57BL6NJ_G0028687	Tgfbr1	Mouse	Gene	transforming growth factor, beta receptor I [Source:MGI Symbol;Acc:MGI:98728] R-MMU-2173791 (Reactome record; description: TGF-beta receptor signaling in EMT (epithelial to mesenchymal transition),) is an external reference matched to Translation MGP_C57BL6NJ_P0066098
MGP_C57BL6NJ_G0029641	Prkcz	Mouse	Gene	protein kinase C, zeta [Source:MGI Symbol;Acc:MGI:97602] R-MMU-2173791 (Reactome record; description: TGF-beta receptor signaling in EMT (epithelial to mesenchymal transition),) is an external reference matched to Translation MGP_C57BL6NJ_P0070216
MGP_129S1SvImJ_G0028267	Tgfbr1	Mouse	Gene	transforming growth factor, beta receptor I [Source:MGI Symbol;Acc:MGI:98728] R-MMU-2173791 (Reactome record; description: TGF-beta receptor signaling in EMT (epithelial to mesenchymal transition),) is an external reference matched to Translation MGP_129S1SvImJ_P0065644
MGP_129S1SvImJ_G0029211	Prkcz	Mouse	Gene	protein kinase C, zeta [Source:MGI Symbol;Acc:MGI:97602] R-MMU-2173791 (Reactome record; description: TGF-beta receptor signaling in EMT (epithelial to mesenchymal transition),) is an external reference matched to Translation MGP_129S1SvImJ_P0069744
MGP_AJ_G0028226	Tgfbr1	Mouse	Gene	transforming growth factor, beta receptor I [Source:MGI Symbol;Acc:MGI:98728] R-MMU-2173791 (Reactome record; description: TGF-beta receptor signaling in EMT (epithelial to mesenchymal transition),) is an external reference matched to Translation MGP_AJ_P0065699
MGP_AJ_G0029176	Prkcz	Mouse	Gene	protein kinase C, zeta [Source:MGI Symbol;Acc:MGI:97602] R-MMU-2173791 (Reactome record; description: TGF-beta receptor signaling in EMT (epithelial to mesenchymal transition),) is an external reference matched to Translation MGP_AJ_P0069810
MGP_129S1SvImJ_G0033301	Arhgef18	Mouse	Gene	rho/rac guanine nucleotide exchange factor (GEF) 18 [Source:MGI Symbol;Acc:MGI:2142567] R-MMU-2173791 (Reactome record; description: TGF-beta receptor signaling in EMT (epithelial to mesenchymal transition),) is an external reference matched to Translation MGP_129S1SvImJ_P0087933
MGP_BALBcJ_G0029192	Prkcz	Mouse	Gene	protein kinase C, zeta [Source:MGI Symbol;Acc:MGI:97602] R-MMU-2173791 (Reactome record; description: TGF-beta receptor signaling in EMT (epithelial to mesenchymal transition),) is an external reference matched to Translation MGP_BALBcJ_P0069729
MGP_BALBcJ_G0028246	Tgfbr1	Mouse	Gene	transforming growth factor, beta receptor I [Source:MGI Symbol;Acc:MGI:98728] R-MMU-2173791 (Reactome record; description: TGF-beta receptor signaling in EMT (epithelial to mesenchymal transition),) is an external reference matched to Translation MGP_BALBcJ_P0065628
MGP_AKRJ_G0028176	Tgfbr1	Mouse	Gene	transforming growth factor, beta receptor I [Source:MGI Symbol;Acc:MGI:98728] R-MMU-2173791 (Reactome record; description: TGF-beta receptor signaling in EMT (epithelial to mesenchymal transition),) is an external reference matched to Translation MGP_AKRJ_P0065588
MGP_AKRJ_G0029124	Prkcz	Mouse	Gene	protein kinase C, zeta [Source:MGI Symbol;Acc:MGI:97602] R-MMU-2173791 (Reactome record; description: TGF-beta receptor signaling in EMT (epithelial to mesenchymal transition),) is an external reference matched to Translation MGP_AKRJ_P0069717
MGP_DBA2J_G0028083	Tgfbr1	Mouse	Gene	transforming growth factor, beta receptor I [Source:MGI Symbol;Acc:MGI:98728] R-MMU-2173791 (Reactome record; description: TGF-beta receptor signaling in EMT (epithelial to mesenchymal transition),) is an external reference matched to Translation MGP_DBA2J_P0065380
MGP_FVBNJ_G0028050	Tgfbr1	Mouse	Gene	transforming growth factor, beta receptor I [Source:MGI Symbol;Acc:MGI:98728] R-MMU-2173791 (Reactome record; description: TGF-beta receptor signaling in EMT (epithelial to mesenchymal transition),) is an external reference matched to Translation MGP_FVBNJ_P0065306
MGP_FVBNJ_G0028988	Prkcz	Mouse	Gene	protein kinase C, zeta [Source:MGI Symbol;Acc:MGI:97602] R-MMU-2173791 (Reactome record; description: TGF-beta receptor signaling in EMT (epithelial to mesenchymal transition),) is an external reference matched to Translation MGP_FVBNJ_P0069371
MGP_NZOHlLtJ_G0028722	Tgfbr1	Mouse	Gene	transforming growth factor, beta receptor I [Source:MGI Symbol;Acc:MGI:98728] R-MMU-2173791 (Reactome record; description: TGF-beta receptor signaling in EMT (epithelial to mesenchymal transition),) is an external reference matched to Translation MGP_NZOHlLtJ_P0066270
MGP_NZOHlLtJ_G0029673	Prkcz	Mouse	Gene	protein kinase C, zeta [Source:MGI Symbol;Acc:MGI:97602] R-MMU-2173791 (Reactome record; description: TGF-beta receptor signaling in EMT (epithelial to mesenchymal transition),) is an external reference matched to Translation MGP_NZOHlLtJ_P0070406
MGP_PWKPhJ_G0028046	Prkcz	Mouse	Gene	protein kinase C, zeta [Source:MGI Symbol;Acc:MGI:97602] R-MMU-2173791 (Reactome record; description: TGF-beta receptor signaling in EMT (epithelial to mesenchymal transition),) is an external reference matched to Translation MGP_PWKPhJ_P0069369
MGP_PWKPhJ_G0027131	Tgfbr1	Mouse	Gene	transforming growth factor, beta receptor I [Source:MGI Symbol;Acc:MGI:98728] R-MMU-2173791 (Reactome record; description: TGF-beta receptor signaling in EMT (epithelial to mesenchymal transition),) is an external reference matched to Translation MGP_PWKPhJ_P0065163
MGP_NODShiLtJ_G0028074	Tgfbr1	Mouse	Gene	transforming growth factor, beta receptor I [Source:MGI Symbol;Acc:MGI:98728] R-MMU-2173791 (Reactome record; description: TGF-beta receptor signaling in EMT (epithelial to mesenchymal transition),) is an external reference matched to Translation MGP_NODShiLtJ_P0065289
MGP_NODShiLtJ_G0029015	Prkcz	Mouse	Gene	protein kinase C, zeta [Source:MGI Symbol;Acc:MGI:97602] R-MMU-2173791 (Reactome record; description: TGF-beta receptor signaling in EMT (epithelial to mesenchymal transition),) is an external reference matched to Translation MGP_NODShiLtJ_P0069390
MGP_LPJ_G0028182	Tgfbr1	Mouse	Gene	transforming growth factor, beta receptor I [Source:MGI Symbol;Acc:MGI:98728] R-MMU-2173791 (Reactome record; description: TGF-beta receptor signaling in EMT (epithelial to mesenchymal transition),) is an external reference matched to Translation MGP_LPJ_P0065484
MGP_LPJ_G0029114	Prkcz	Mouse	Gene	protein kinase C, zeta [Source:MGI Symbol;Acc:MGI:97602] R-MMU-2173791 (Reactome record; description: TGF-beta receptor signaling in EMT (epithelial to mesenchymal transition),) is an external reference matched to Translation MGP_LPJ_P0069543
MGP_DBA2J_G0029024	Prkcz	Mouse	Gene	protein kinase C, zeta [Source:MGI Symbol;Acc:MGI:97602] R-MMU-2173791 (Reactome record; description: TGF-beta receptor signaling in EMT (epithelial to mesenchymal transition),) is an external reference matched to Translation MGP_DBA2J_P0069462
MGP_WSBEiJ_G0027484	Tgfbr1	Mouse	Gene	transforming growth factor, beta receptor I [Source:MGI Symbol;Acc:MGI:98728] R-MMU-2173791 (Reactome record; description: TGF-beta receptor signaling in EMT (epithelial to mesenchymal transition),) is an external reference matched to Translation MGP_WSBEiJ_P0064504
MGP_WSBEiJ_G0028406	Prkcz	Mouse	Gene	protein kinase C, zeta [Source:MGI Symbol;Acc:MGI:97602] R-MMU-2173791 (Reactome record; description: TGF-beta receptor signaling in EMT (epithelial to mesenchymal transition),) is an external reference matched to Translation MGP_WSBEiJ_P0068550
MGP_C57BL6NJ_G0032324	Tgfb1	Mouse	Gene	transforming growth factor, beta 1 [Source:MGI Symbol;Acc:MGI:98725] R-MMU-2173791 (Reactome record; description: TGF-beta receptor signaling in EMT (epithelial to mesenchymal transition),) is an external reference matched to Translation MGP_C57BL6NJ_P0082858
MGP_C3HHeJ_G0031581	Tgfb1	Mouse	Gene	transforming growth factor, beta 1 [Source:MGI Symbol;Acc:MGI:98725] R-MMU-2173791 (Reactome record; description: TGF-beta receptor signaling in EMT (epithelial to mesenchymal transition),) is an external reference matched to Translation MGP_C3HHeJ_P0081989
MGP_CASTEiJ_G0030921	Tgfb1	Mouse	Gene	transforming growth factor, beta 1 [Source:MGI Symbol;Acc:MGI:98725] R-MMU-2173791 (Reactome record; description: TGF-beta receptor signaling in EMT (epithelial to mesenchymal transition),) is an external reference matched to Translation MGP_CASTEiJ_P0082517
MGP_CBAJ_G0031546	Tgfb1	Mouse	Gene	transforming growth factor, beta 1 [Source:MGI Symbol;Acc:MGI:98725] R-MMU-2173791 (Reactome record; description: TGF-beta receptor signaling in EMT (epithelial to mesenchymal transition),) is an external reference matched to Translation MGP_CBAJ_P0081937
MGP_129S1SvImJ_G0031876	Tgfb1	Mouse	Gene	transforming growth factor, beta 1 [Source:MGI Symbol;Acc:MGI:98725] R-MMU-2173791 (Reactome record; description: TGF-beta receptor signaling in EMT (epithelial to mesenchymal transition),) is an external reference matched to Translation MGP_129S1SvImJ_P0082366
MGP_AJ_G0031855	Tgfb1	Mouse	Gene	transforming growth factor, beta 1 [Source:MGI Symbol;Acc:MGI:98725] R-MMU-2173791 (Reactome record; description: TGF-beta receptor signaling in EMT (epithelial to mesenchymal transition),) is an external reference matched to Translation MGP_AJ_P0082438
MGP_BALBcJ_G0031860	Tgfb1	Mouse	Gene	transforming growth factor, beta 1 [Source:MGI Symbol;Acc:MGI:98725] R-MMU-2173791 (Reactome record; description: TGF-beta receptor signaling in EMT (epithelial to mesenchymal transition),) is an external reference matched to Translation MGP_BALBcJ_P0082392
MGP_AKRJ_G0031784	Tgfb1	Mouse	Gene	transforming growth factor, beta 1 [Source:MGI Symbol;Acc:MGI:98725] R-MMU-2173791 (Reactome record; description: TGF-beta receptor signaling in EMT (epithelial to mesenchymal transition),) is an external reference matched to Translation MGP_AKRJ_P0082370
MGP_NZOHlLtJ_G0032356	Tgfb1	Mouse	Gene	transforming growth factor, beta 1 [Source:MGI Symbol;Acc:MGI:98725] R-MMU-2173791 (Reactome record; description: TGF-beta receptor signaling in EMT (epithelial to mesenchymal transition),) is an external reference matched to Translation MGP_NZOHlLtJ_P0083142
MGP_PWKPhJ_G0030645	Tgfb1	Mouse	Gene	transforming growth factor, beta 1 [Source:MGI Symbol;Acc:MGI:98725] R-MMU-2173791 (Reactome record; description: TGF-beta receptor signaling in EMT (epithelial to mesenchymal transition),) is an external reference matched to Translation MGP_PWKPhJ_P0081946
MGP_NODShiLtJ_G0031690	Tgfb1	Mouse	Gene	transforming growth factor, beta 1 [Source:MGI Symbol;Acc:MGI:98725] R-MMU-2173791 (Reactome record; description: TGF-beta receptor signaling in EMT (epithelial to mesenchymal transition),) is an external reference matched to Translation MGP_NODShiLtJ_P0081997
MGP_LPJ_G0031779	Tgfb1	Mouse	Gene	transforming growth factor, beta 1 [Source:MGI Symbol;Acc:MGI:98725] R-MMU-2173791 (Reactome record; description: TGF-beta receptor signaling in EMT (epithelial to mesenchymal transition),) is an external reference matched to Translation MGP_LPJ_P0082119
MGP_DBA2J_G0031700	Tgfb1	Mouse	Gene	transforming growth factor, beta 1 [Source:MGI Symbol;Acc:MGI:98725] R-MMU-2173791 (Reactome record; description: TGF-beta receptor signaling in EMT (epithelial to mesenchymal transition),) is an external reference matched to Translation MGP_DBA2J_P0082101
MGP_FVBNJ_G0031653	Tgfb1	Mouse	Gene	transforming growth factor, beta 1 [Source:MGI Symbol;Acc:MGI:98725] R-MMU-2173791 (Reactome record; description: TGF-beta receptor signaling in EMT (epithelial to mesenchymal transition),) is an external reference matched to Translation MGP_FVBNJ_P0081974
MGP_WSBEiJ_G0031024	Tgfb1	Mouse	Gene	transforming growth factor, beta 1 [Source:MGI Symbol;Acc:MGI:98725] R-MMU-2173791 (Reactome record; description: TGF-beta receptor signaling in EMT (epithelial to mesenchymal transition),) is an external reference matched to Translation MGP_WSBEiJ_P0081041
MGP_BALBcJ_G0024225	Gm5239	Mouse	Gene	predicted pseudogene 5239 [Source:MGI Symbol;Acc:MGI:3648788] R-MMU-2173791 (Reactome record; description: TGF-beta receptor signaling in EMT (epithelial to mesenchymal transition),) is an external reference matched to Translation MGP_BALBcJ_P0049209
MGP_AJ_G0024225	Gm5239	Mouse	Gene	predicted pseudogene 5239 [Source:MGI Symbol;Acc:MGI:3648788] R-MMU-2173791 (Reactome record; description: TGF-beta receptor signaling in EMT (epithelial to mesenchymal transition),) is an external reference matched to Translation MGP_AJ_P0049248
MGP_CBAJ_G0023960	Gm5239	Mouse	Gene	predicted pseudogene 5239 [Source:MGI Symbol;Acc:MGI:3648788] R-MMU-2173791 (Reactome record; description: TGF-beta receptor signaling in EMT (epithelial to mesenchymal transition),) is an external reference matched to Translation MGP_CBAJ_P0048877
MGP_C3HHeJ_G0026760	Gm8797	Mouse	Gene	predicted pseudogene 8797 [Source:MGI Symbol;Acc:MGI:3643769] R-MMU-2173791 (Reactome record; description: TGF-beta receptor signaling in EMT (epithelial to mesenchymal transition),) is an external reference matched to Translation MGP_C3HHeJ_P0059652
MGP_129S1SvImJ_G0024259	Gm5239	Mouse	Gene	predicted pseudogene 5239 [Source:MGI Symbol;Acc:MGI:3648788] R-MMU-2173791 (Reactome record; description: TGF-beta receptor signaling in EMT (epithelial to mesenchymal transition),) is an external reference matched to Translation MGP_129S1SvImJ_P0049268
MGP_129S1SvImJ_G0027047	Gm8797	Mouse	Gene	predicted pseudogene 8797 [Source:MGI Symbol;Acc:MGI:3643769] R-MMU-2173791 (Reactome record; description: TGF-beta receptor signaling in EMT (epithelial to mesenchymal transition),) is an external reference matched to Translation MGP_129S1SvImJ_P0060007
MGP_AJ_G0027011	Gm8797	Mouse	Gene	predicted pseudogene 8797 [Source:MGI Symbol;Acc:MGI:3643769] R-MMU-2173791 (Reactome record; description: TGF-beta receptor signaling in EMT (epithelial to mesenchymal transition),) is an external reference matched to Translation MGP_AJ_P0060037
MGP_C3HHeJ_G0033982	Pard3	Mouse	Gene	par-3 family cell polarity regulator [Source:MGI Symbol;Acc:MGI:2135608] R-MMU-2173791 (Reactome record; description: TGF-beta receptor signaling in EMT (epithelial to mesenchymal transition),) is an external reference matched to Translation MGP_C3HHeJ_P0090605
MGP_CASTEiJ_G0033309	Pard3	Mouse	Gene	par-3 family cell polarity regulator [Source:MGI Symbol;Acc:MGI:2135608] R-MMU-2173791 (Reactome record; description: TGF-beta receptor signaling in EMT (epithelial to mesenchymal transition),) is an external reference matched to Translation MGP_CASTEiJ_P0091174
MGP_CBAJ_G0033956	Pard3	Mouse	Gene	par-3 family cell polarity regulator [Source:MGI Symbol;Acc:MGI:2135608] R-MMU-2173791 (Reactome record; description: TGF-beta receptor signaling in EMT (epithelial to mesenchymal transition),) is an external reference matched to Translation MGP_CBAJ_P0090536
MGP_AJ_G0034278	Pard3	Mouse	Gene	par-3 family cell polarity regulator [Source:MGI Symbol;Acc:MGI:2135608] R-MMU-2173791 (Reactome record; description: TGF-beta receptor signaling in EMT (epithelial to mesenchymal transition),) is an external reference matched to Translation MGP_AJ_P0091105
MGP_BALBcJ_G0027020	Gm8797	Mouse	Gene	predicted pseudogene 8797 [Source:MGI Symbol;Acc:MGI:3643769] R-MMU-2173791 (Reactome record; description: TGF-beta receptor signaling in EMT (epithelial to mesenchymal transition),) is an external reference matched to Translation MGP_BALBcJ_P0059965
MGP_AKRJ_G0026981	Gm8797	Mouse	Gene	predicted pseudogene 8797 [Source:MGI Symbol;Acc:MGI:3643769] R-MMU-2173791 (Reactome record; description: TGF-beta receptor signaling in EMT (epithelial to mesenchymal transition),) is an external reference matched to Translation MGP_AKRJ_P0059974
MGP_AKRJ_G0024193	Gm5239	Mouse	Gene	predicted pseudogene 5239 [Source:MGI Symbol;Acc:MGI:3648788] R-MMU-2173791 (Reactome record; description: TGF-beta receptor signaling in EMT (epithelial to mesenchymal transition),) is an external reference matched to Translation MGP_AKRJ_P0049207
MGP_BALBcJ_G0034271	Pard3	Mouse	Gene	par-3 family cell polarity regulator [Source:MGI Symbol;Acc:MGI:2135608] R-MMU-2173791 (Reactome record; description: TGF-beta receptor signaling in EMT (epithelial to mesenchymal transition),) is an external reference matched to Translation MGP_BALBcJ_P0091034
MGP_AKRJ_G0034205	Pard3	Mouse	Gene	par-3 family cell polarity regulator [Source:MGI Symbol;Acc:MGI:2135608] R-MMU-2173791 (Reactome record; description: TGF-beta receptor signaling in EMT (epithelial to mesenchymal transition),) is an external reference matched to Translation MGP_AKRJ_P0091045
MGP_DBA2J_G0024092	Gm5239	Mouse	Gene	predicted pseudogene 5239 [Source:MGI Symbol;Acc:MGI:3648788] R-MMU-2173791 (Reactome record; description: TGF-beta receptor signaling in EMT (epithelial to mesenchymal transition),) is an external reference matched to Translation MGP_DBA2J_P0048985
MGP_DBA2J_G0026874	Gm8797	Mouse	Gene	predicted pseudogene 8797 [Source:MGI Symbol;Acc:MGI:3643769] R-MMU-2173791 (Reactome record; description: TGF-beta receptor signaling in EMT (epithelial to mesenchymal transition),) is an external reference matched to Translation MGP_DBA2J_P0059731
MGP_FVBNJ_G0024059	Gm5239	Mouse	Gene	predicted pseudogene 5239 [Source:MGI Symbol;Acc:MGI:3648788] R-MMU-2173791 (Reactome record; description: TGF-beta receptor signaling in EMT (epithelial to mesenchymal transition),) is an external reference matched to Translation MGP_FVBNJ_P0048946
MGP_FVBNJ_G0026841	Gm8797	Mouse	Gene	predicted pseudogene 8797 [Source:MGI Symbol;Acc:MGI:3643769] R-MMU-2173791 (Reactome record; description: TGF-beta receptor signaling in EMT (epithelial to mesenchymal transition),) is an external reference matched to Translation MGP_FVBNJ_P0059713
MGP_NODShiLtJ_G0024087	Gm5239	Mouse	Gene	predicted pseudogene 5239 [Source:MGI Symbol;Acc:MGI:3648788] R-MMU-2173791 (Reactome record; description: TGF-beta receptor signaling in EMT (epithelial to mesenchymal transition),) is an external reference matched to Translation MGP_NODShiLtJ_P0048947
MGP_NODShiLtJ_G0026861	Gm8797	Mouse	Gene	predicted pseudogene 8797 [Source:MGI Symbol;Acc:MGI:3643769] R-MMU-2173791 (Reactome record; description: TGF-beta receptor signaling in EMT (epithelial to mesenchymal transition),) is an external reference matched to Translation MGP_NODShiLtJ_P0059697
MGP_NZOHlLtJ_G0027524	Gm8797	Mouse	Gene	predicted pseudogene 8797 [Source:MGI Symbol;Acc:MGI:3643769] R-MMU-2173791 (Reactome record; description: TGF-beta receptor signaling in EMT (epithelial to mesenchymal transition),) is an external reference matched to Translation MGP_NZOHlLtJ_P0060621
MGP_NZOHlLtJ_G0034810	Pard3	Mouse	Gene	par-3 family cell polarity regulator [Source:MGI Symbol;Acc:MGI:2135608] R-MMU-2173791 (Reactome record; description: TGF-beta receptor signaling in EMT (epithelial to mesenchymal transition),) is an external reference matched to Translation MGP_NZOHlLtJ_P0091870
MGP_PWKPhJ_G0033012	Pard3	Mouse	Gene	par-3 family cell polarity regulator [Source:MGI Symbol;Acc:MGI:2135608] R-MMU-2173791 (Reactome record; description: TGF-beta receptor signaling in EMT (epithelial to mesenchymal transition),) is an external reference matched to Translation MGP_PWKPhJ_P0090611
MGP_NZOHlLtJ_G0024715	Gm5239	Mouse	Gene	predicted pseudogene 5239 [Source:MGI Symbol;Acc:MGI:3648788] R-MMU-2173791 (Reactome record; description: TGF-beta receptor signaling in EMT (epithelial to mesenchymal transition),) is an external reference matched to Translation MGP_NZOHlLtJ_P0049803
MGP_NODShiLtJ_G0034102	Pard3	Mouse	Gene	par-3 family cell polarity regulator [Source:MGI Symbol;Acc:MGI:2135608] R-MMU-2173791 (Reactome record; description: TGF-beta receptor signaling in EMT (epithelial to mesenchymal transition),) is an external reference matched to Translation MGP_NODShiLtJ_P0090610
MGP_LPJ_G0024174	Gm5239	Mouse	Gene	predicted pseudogene 5239 [Source:MGI Symbol;Acc:MGI:3648788] R-MMU-2173791 (Reactome record; description: TGF-beta receptor signaling in EMT (epithelial to mesenchymal transition),) is an external reference matched to Translation MGP_LPJ_P0049097
MGP_LPJ_G0034200	Pard3	Mouse	Gene	par-3 family cell polarity regulator [Source:MGI Symbol;Acc:MGI:2135608] R-MMU-2173791 (Reactome record; description: TGF-beta receptor signaling in EMT (epithelial to mesenchymal transition),) is an external reference matched to Translation MGP_LPJ_P0090773
MGP_CASTEiJ_G0023467	Gm5239	Mouse	Gene	predicted pseudogene 5239 [Source:MGI Symbol;Acc:MGI:3648788] R-MMU-2173791 (Reactome record; description: TGF-beta receptor signaling in EMT (epithelial to mesenchymal transition),) is an external reference matched to Translation MGP_CASTEiJ_P0049046
MGP_C3HHeJ_G0023992	Gm5239	Mouse	Gene	predicted pseudogene 5239 [Source:MGI Symbol;Acc:MGI:3648788] R-MMU-2173791 (Reactome record; description: TGF-beta receptor signaling in EMT (epithelial to mesenchymal transition),) is an external reference matched to Translation MGP_C3HHeJ_P0048952
MGP_DBA2J_G0034111	Pard3	Mouse	Gene	par-3 family cell polarity regulator [Source:MGI Symbol;Acc:MGI:2135608] R-MMU-2173791 (Reactome record; description: TGF-beta receptor signaling in EMT (epithelial to mesenchymal transition),) is an external reference matched to Translation MGP_DBA2J_P0090749
MGP_FVBNJ_G0034056	Pard3	Mouse	Gene	par-3 family cell polarity regulator [Source:MGI Symbol;Acc:MGI:2135608] R-MMU-2173791 (Reactome record; description: TGF-beta receptor signaling in EMT (epithelial to mesenchymal transition),) is an external reference matched to Translation MGP_FVBNJ_P0090582
MGP_WSBEiJ_G0023530	Gm5239	Mouse	Gene	predicted pseudogene 5239 [Source:MGI Symbol;Acc:MGI:3648788] R-MMU-2173791 (Reactome record; description: TGF-beta receptor signaling in EMT (epithelial to mesenchymal transition),) is an external reference matched to Translation MGP_WSBEiJ_P0048249
MGP_PWKPhJ_G0023211	Gm5239	Mouse	Gene	predicted pseudogene 5239 [Source:MGI Symbol;Acc:MGI:3648788] R-MMU-2173791 (Reactome record; description: TGF-beta receptor signaling in EMT (epithelial to mesenchymal transition),) is an external reference matched to Translation MGP_PWKPhJ_P0048646
MGP_WSBEiJ_G0029995	Gm8797	Mouse	Gene	predicted pseudogene 8797 [Source:MGI Symbol;Acc:MGI:3643769] R-MMU-2173791 (Reactome record; description: TGF-beta receptor signaling in EMT (epithelial to mesenchymal transition),) is an external reference matched to Translation MGP_WSBEiJ_P0076583
MGP_WSBEiJ_G0033427	Pard3	Mouse	Gene	par-3 family cell polarity regulator [Source:MGI Symbol;Acc:MGI:2135608] R-MMU-2173791 (Reactome record; description: TGF-beta receptor signaling in EMT (epithelial to mesenchymal transition),) is an external reference matched to Translation MGP_WSBEiJ_P0089643
MGP_C3HHeJ_G0033398	Uba52	Mouse	Gene	ubiquitin A-52 residue ribosomal protein fusion product 1 [Source:MGI Symbol;Acc:MGI:98887] R-MMU-2173791 (Reactome record; description: TGF-beta receptor signaling in EMT (epithelial to mesenchymal transition),) is an external reference matched to Translation MGP_C3HHeJ_P0088801
MGP_C57BL6NJ_G0034791	Pard3	Mouse	Gene	par-3 family cell polarity regulator [Source:MGI Symbol;Acc:MGI:2135608] R-MMU-2173791 (Reactome record; description: TGF-beta receptor signaling in EMT (epithelial to mesenchymal transition),) is an external reference matched to Translation MGP_C57BL6NJ_P0091551
MGP_129S1SvImJ_G0033709	Uba52	Mouse	Gene	ubiquitin A-52 residue ribosomal protein fusion product 1 [Source:MGI Symbol;Acc:MGI:98887] R-MMU-2173791 (Reactome record; description: TGF-beta receptor signaling in EMT (epithelial to mesenchymal transition),) is an external reference matched to Translation MGP_129S1SvImJ_P0089211
MGP_129S1SvImJ_G0034299	Pard3	Mouse	Gene	par-3 family cell polarity regulator [Source:MGI Symbol;Acc:MGI:2135608] R-MMU-2173791 (Reactome record; description: TGF-beta receptor signaling in EMT (epithelial to mesenchymal transition),) is an external reference matched to Translation MGP_129S1SvImJ_P0091025
MGP_NZOHlLtJ_G0034223	Uba52	Mouse	Gene	ubiquitin A-52 residue ribosomal protein fusion product 1 [Source:MGI Symbol;Acc:MGI:98887] R-MMU-2173791 (Reactome record; description: TGF-beta receptor signaling in EMT (epithelial to mesenchymal transition),) is an external reference matched to Translation MGP_NZOHlLtJ_P0090053
MGP_PWKPhJ_G0032431	Uba52	Mouse	Gene	ubiquitin A-52 residue ribosomal protein fusion product 1 [Source:MGI Symbol;Acc:MGI:98887] R-MMU-2173791 (Reactome record; description: TGF-beta receptor signaling in EMT (epithelial to mesenchymal transition),) is an external reference matched to Translation MGP_PWKPhJ_P0088766
MGP_DBA2J_G0033530	Uba52	Mouse	Gene	ubiquitin A-52 residue ribosomal protein fusion product 1 [Source:MGI Symbol;Acc:MGI:98887] R-MMU-2173791 (Reactome record; description: TGF-beta receptor signaling in EMT (epithelial to mesenchymal transition),) is an external reference matched to Translation MGP_DBA2J_P0088944
MGP_FVBNJ_G0033471	Uba52	Mouse	Gene	ubiquitin A-52 residue ribosomal protein fusion product 1 [Source:MGI Symbol;Acc:MGI:98887] R-MMU-2173791 (Reactome record; description: TGF-beta receptor signaling in EMT (epithelial to mesenchymal transition),) is an external reference matched to Translation MGP_FVBNJ_P0088781

## Sheet: HALLMARK
STANDARD_NAME	HALLMARK_EPITHELIAL_MESENCHYMAL_TRANSITION
SYSTEMATIC_NAME	MM3889
COLLECTION	MH
MSIGDB_URL	https://www.gsea-msigdb.org/gsea/msigdb/mouse/geneset/HALLMARK_EPITHELIAL_MESENCHYMAL_TRANSITION
NAMESPACE	MGI_ID
DESCRIPTION_BRIEF	Mouse genes annotated to HALLMARK_EPITHELIAL_MESENCHYMAL_TRANSITION based on orthology mappings provided by the Alliance Genome Consortium
DESCRIPTION_FULL
PMID	30224793
GEOID
AUTHORS	Howe DG,Blake JA,Bradford YM,Bult CJ,Calvi BR,Engel SR,Kadin JA,Kaufman TC,Kishore R,Laulederkind SJF,Lewis SE,Moxon SAT,Richardson JE,Smith C
CONTRIBUTOR	Mouse Genome Informatics (MGI)
CONTRIBUTOR_ORG	The Jackson Laboratory (JAX)
EXACT_SOURCE	Alliance Genome Consortium orthologs based on HALLMARK_EPITHELIAL_MESENCHYMAL_TRANSITION
FILTERED_BY_SIMILARITY
EXTERNAL_NAMES_FOR_SIMILAR_TERMS
EXTERNAL_DETAILS_URL	http://www.broadinstitute.org/gsea/msigdb/cards/HALLMARK_EPITHELIAL_MESENCHYMAL_TRANSITION
SOURCE_MEMBERS	MGI:101780,MGI:101781,MGI:101900,MGI:101922,MGI:102793,MGI:102889,MGI:103014,MGI:103033,MGI:103060,MGI:103178,MGI:103556,MGI:104627,MGI:104637,MGI:104641,MGI:105099,MGI:105371,MGI:105378,MGI:106012,MGI:106096,MGI:107435,MGI:107741,MGI:107776,MGI:107799,MGI:107949,MGI:108409,MGI:108460,MGI:108543,MGI:109124,MGI:109147,MGI:109175,MGI:109347,MGI:1095396,MGI:109587,MGI:109608,MGI:109613,MGI:1096393,M…
GENE_SYMBOLS	Serpine2,Sntb1,Mmp14,Tnc,Fstl1,Vcan,Il15,Scg2,Ecm1,Vegfa,Cxcl12,Dst,Tgfbr3,Ptx3,Pcolce,Spock1,Adam12,Tagln,Loxl1,Cdh6,Pvr,Gadd45b,Gadd45a,Rhob,Rgs4,Fzd8,Tfpi2,Vegfc,Oxtr,Dab2,Lum,Col16a1,Tnfrsf11b,Fap,Matn2,Snai2,Cxcl5,Calu,Capg,Emp3,Nnmt,Gpc1,Tnfaip3,Nid2,Mcm7,Slit3,Slit2,Matn3,Fmod,Edil3,Dkk1,Qsox1,Copa,Cxcl15,Crlf1,Grem1,Fbln5,Sgcb,Sgcg,Sgcd,Plod2,Plod3,Foxc2,Sdc1,Sdc4,Dpysl3,Tnfrsf12a,Pdlim4,…
FOUNDER_NAMES

## Sheet: MGI
Type	MGI ID	Symbol	Name	Chr	Start	End	Build	Strand	Best Match Type	Best Match	Match Score
protein coding gene	MGI:96621	Itk	IL2 inducible T cell kinase	11	46215977	46280342	GRCm39	-	Synonym	Emt	4
protein coding gene	MGI:1333817	Slc22a3	solute carrier family 22 (organic cation transporter), member 3	17	12638859	12726591	GRCm39	-	Synonym	EMT	4
protein coding gene	MGI:2140340	Akna	AT-hook transcription factor	4	63285362	63321591	GRCm39	-	Process	epithelial to mesenchymal transition (synonym: EMT)	3
protein coding gene	MGI:1913765	Cul7	cullin 7	17	46961264	46975290	GRCm39	+	Process	epithelial to mesenchymal transition (synonym: EMT)	3
protein coding gene	MGI:3654828	Dact3	dishevelled-binding antagonist of beta-catenin 3	7	16609242	16621226	GRCm39	+	Process	epithelial to mesenchymal transition (synonym: EMT)	3
protein coding gene	MGI:105037	Ddx5	DEAD box helicase 5	11	106671181	106680011	GRCm39	-	Process	epithelial to mesenchymal transition (synonym: EMT)	3
protein coding gene	MGI:1914290	Ddx17	DEAD box helicase 17	15	79411937	79430942	GRCm39	-	Process	epithelial to mesenchymal transition (synonym: EMT)	3
protein coding gene	MGI:1918478	Dlg5	discs large MAGUK scaffold protein 5	14	24184021	24295988	GRCm39	-	Process	epithelial to mesenchymal transition (synonym: EMT)	3
protein coding gene	MGI:103006	Epb41l5	erythrocyte membrane protein band 4.1 like 5	1	119472767	119576730	GRCm39	-	Process	epithelial to mesenchymal transition (synonym: EMT)	3
protein coding gene	MGI:1919128	Fam83d	family with sequence similarity 83, member D	2	158610019	158628557	GRCm39	+	Process	epithelial to mesenchymal transition (synonym: EMT)	3
protein coding gene	MGI:95522	Fgfr1	fibroblast growth factor receptor 1	8	26008775	26065734	GRCm39	+	Process	epithelial to mesenchymal transition (synonym: EMT)	3
protein coding gene	MGI:95523	Fgfr2	fibroblast growth factor receptor 2	7	129764181	129868538	GRCm39	-	Process	epithelial to mesenchymal transition (synonym: EMT)	3
protein coding gene	MGI:95556	Flna	filamin, alpha	X	73267067	73293426	GRCm39	-	Process	epithelial to mesenchymal transition (synonym: EMT)	3
protein coding gene	MGI:1861437	Gsk3b	glycogen synthase kinase 3 beta	16	37909363	38066446	GRCm39	+	Process	epithelial to mesenchymal transition (synonym: EMT)	3
protein coding gene	MGI:106918	Hif1a	hypoxia inducible factor 1, alpha subunit	12	73948149	73994304	GRCm39	+	Process	epithelial to mesenchymal transition (synonym: EMT)	3
protein coding gene	MGI:101761	Hmga2	high mobility group AT-hook 2	10	120197180	120312374	GRCm39	-	Process	epithelial to mesenchymal transition (synonym: EMT)	3
protein coding gene	MGI:1330294	Hnrnpab	heterogeneous nuclear ribonucleoprotein A/B	11	51490927	51497674	GRCm39	-	Process	epithelial to mesenchymal transition (synonym: EMT)	3
protein coding gene	MGI:1337004	Loxl3	lysyl oxidase-like 3	6	83011186	83029547	GRCm39	+	Process	epithelial to mesenchymal transition (synonym: EMT)	3
protein coding gene	MGI:97168	Msx1	msh homeobox 1	5	37977835	37981929	GRCm39	-	Process	epithelial to mesenchymal transition (synonym: EMT)	3
protein coding gene	MGI:102469	Nfatc1	nuclear factor of activated T cells, cytoplasmic, calcineurin dependent 1	18	80649420	80756286	GRCm39	-	Process	epithelial to mesenchymal transition (synonym: EMT)	3
protein coding gene	MGI:97363	Notch1	notch 1	2	26347914	26393834	GRCm39	-	Process	epithelial to mesenchymal transition (synonym: EMT)	3
protein coding gene	MGI:107471	Notch4	notch 4	17	34783242	34807477	GRCm39	+	Process	epithelial to mesenchymal transition (synonym: EMT)	3
protein coding gene	MGI:107172	Ppp3r1	protein phosphatase 3, regulatory subunit B, alpha isoform (calcineurin B, type I)	11	17109298	17150380	GRCm39	+	Process	epithelial to mesenchymal transition (synonym: EMT)	3
protein coding gene	MGI:96522	Rbpj	recombination signal binding protein for immunoglobulin kappa J region	5	53713121	53814787	GRCm39	+	Process	epithelial to mesenchymal transition (synonym: EMT)	3
protein coding gene	MGI:1923816	Rflnb	refilin B	11	75910020	75918608	GRCm39	-	Process	epithelial to mesenchymal transition (synonym: EMT)	3
lncRNA gene	MGI:1922995	Rian	RNA imprinted and accumulated in nucleus	12	109570379	109628150	GRCm39	+	Process	epithelial to mesenchymal transition (synonym: EMT)	3
protein coding gene	MGI:107927	Rock1	Rho-associated coiled-coil containing protein kinase 1	18	10064401	10182045	GRCm39	-	Process	epithelial to mesenchymal transition (synonym: EMT)	3
protein coding gene	MGI:107926	Rock2	Rho-associated coiled-coil containing protein kinase 2	12	16944896	17037824	GRCm39	+	Process	epithelial to mesenchymal transition (synonym: EMT)	3
protein coding gene	MGI:1913322	Sdhaf2	succinate dehydrogenase complex assembly factor 2	19	10477876	10502573	GRCm39	-	Process	epithelial to mesenchymal transition (synonym: EMT)	3
protein coding gene	MGI:1914515	Slc39a10	solute carrier family 39 (zinc transporter), member 10	1	46846704	46932012	GRCm39	-	Process	epithelial to mesenchymal transition (synonym: EMT)	3
protein coding gene	MGI:98330	Snai1	snail family zinc finger 1	2	167380115	167384734	GRCm39	+	Process	epithelial to mesenchymal transition (synonym: EMT)	3
protein coding gene	MGI:1096393	Snai2	snail family zinc finger 2	16	14523716	14527249	GRCm39	+	Process	epithelial to mesenchymal transition (synonym: EMT)	3
protein coding gene	MGI:98371	Sox9	SRY (sex determining region Y)-box 9	11	112673050	112678586	GRCm39	+	Process	epithelial to mesenchymal transition (synonym: EMT)	3
protein coding gene	MGI:1932575	Sp6	trans-acting transcription factor 6	11	96904395	96915565	GRCm39	+	Process	epithelial to mesenchymal transition (synonym: EMT)	3
protein coding gene	MGI:98725	Tgfb1	transforming growth factor, beta 1	7	25386427	25404502	GRCm39	+	Process	epithelial to mesenchymal transition (synonym: EMT)	3
protein coding gene	MGI:104637	Tgfbr3	transforming growth factor, beta receptor III	5	107254436	107437495	GRCm39	-	Process	epithelial to mesenchymal transition (synonym: EMT)	3
protein coding gene	MGI:109274	Trim28	tripartite motif-containing 28	7	12758079	12764959	GRCm39	+	Process	epithelial to mesenchymal transition (synonym: EMT)	3
protein coding gene	MGI:2146901	Trip10	thyroid hormone receptor interactor 10	17	57556455	57570665	GRCm39	+	Process	epithelial to mesenchymal transition (synonym: EMT)	3
protein coding gene	MGI:101948	Wnt11	wingless-type MMTV integration site family, member 11	7	98484293	98503954	GRCm39	+	Process	epithelial to mesenchymal transition (synonym: EMT)	3
protein coding gene	MGI:87911	Acvr1	activin A receptor, type 1	2	58336450	58456840	GRCm39	-	Subterm Process	positive regulation of epithelial to mesenchymal transition involved in endocardial cushion formation (synonym: EMT)	3
protein coding gene	MGI:107825	Adam8	a disintegrin and metallopeptidase domain 8	7	139558845	139572475	GRCm39	-	Subterm Process	positive regulation of epithelial to mesenchymal transition (synonym: EMT)	3
protein coding gene	MGI:1333882	Adam15	a disintegrin and metallopeptidase domain 15 (metargidin)	3	89246947	89257589	GRCm39	-	Subterm Process	cardiac epithelial to mesenchymal transition (synonym: EMT)	3
protein coding gene	MGI:1919924	Adipor1	adiponectin receptor 1	1	134343116	134361089	GRCm39	+	Subterm Process	negative regulation of epithelial to mesenchymal transition (synonym: EMT)	3
protein coding gene	MGI:893592	Ager	advanced glycosylation end product-specific receptor	17	34816836	34819910	GRCm39	+	Subterm Process	positive regulation of epithelial to mesenchymal transition (synonym: EMT)	3
protein coding gene	MGI:87963	Agt	angiotensinogen (serpin peptidase inhibitor, clade A, member 8)	8	125283326	125296445	GRCm39	-	Subterm Process	positive regulation of epithelial to mesenchymal transition (synonym: EMT)	3
protein coding gene	MGI:104621	Alx1	ALX homeobox 1	10	102843708	102865501	GRCm39	-	Subterm Process	positive regulation of epithelial to mesenchymal transition (synonym: EMT)	3
protein coding gene	MGI:1919353	Aplf	aprataxin and PNKP like factor	6	87605406	87649175	GRCm39	-	Subterm Process	regulation of epithelial to mesenchymal transition (synonym: EMT)	3
protein coding gene	MGI:1270862	Axin2	axin 2	11	108811175	108841609	GRCm39	+	Subterm Process	positive regulation of epithelial to mesenchymal transition (synonym: EMT)	3
protein coding gene	MGI:1915260	Bambi	BMP and activin membrane-bound inhibitor	18	3507923	3516404	GRCm39	+	Subterm Process	positive regulation of epithelial to mesenchymal transition (synonym: EMT)	3
protein coding gene	MGI:1933114	Bcl9l	B cell CLL/lymphoma 9-like	9	44394122	44423193	GRCm39	+	Subterm Process	positive regulation of epithelial to mesenchymal transition (synonym: EMT)	3
protein coding gene	MGI:88177	Bmp2	bone morphogenetic protein 2	2	133394079	133404805	GRCm39	+	Subterm Process	cardiac epithelial to mesenchymal transition (synonym: EMT)	3
protein coding gene	MGI:88180	Bmp4	bone morphogenetic protein 4	14	46620982	46628126	GRCm39	-	Subterm Process	positive regulation of epithelial to mesenchymal transition (synonym: EMT)	3
protein coding gene	MGI:103302	Bmp7	bone morphogenetic protein 7	2	172709805	172782114	GRCm39	-	Subterm Process	positive regulation of epithelial to mesenchymal transition (synonym: EMT)	3
protein coding gene	MGI:1313268	Chrd	chordin	16	20551877	20561134	GRCm39	+	Subterm Process	neural crest formation (synonym: EMT)	3
protein coding gene	MGI:1923957	Clasp1	CLIP associating protein 1	1	118314976	118537192	GRCm39	+	Subterm Process	regulation of epithelial to mesenchymal transition (synonym: EMT)	3
protein coding gene	MGI:1923749	Clasp2	CLIP associating protein 2	9	113570541	113748750	GRCm39	+	Subterm Process	regulation of epithelial to mesenchymal transition (synonym: EMT)	3
protein coding gene	MGI:88467	Col1a1	collagen, type I, alpha 1	11	94827050	94843868	GRCm39	+	Subterm Process	positive regulation of epithelial to mesenchymal transition (synonym: EMT)	3
protein coding gene	MGI:2679260	Crb2	crumbs family member 2	2	37666261	37689115	GRCm39	+	Subterm Process	positive regulation of epithelial to mesenchymal transition (synonym: EMT)	3
protein coding gene	MGI:88276	Ctnnb1	catenin (cadherin associated protein), beta 1	9	120762466	120789573	GRCm39	+	Subterm Process	positive regulation of epithelial to mesenchymal transition (synonym: EMT)	3
protein coding gene	MGI:109175	Dab2	disabled 2, mitogen-responsive phosphoprotein	15	6329269	6470193	GRCm39	+	Subterm Process	positive regulation of epithelial to mesenchymal transition (synonym: EMT)	3
protein coding gene	MGI:1916851	Dab2ip	disabled 2 interacting protein	2	35448285	35621006	GRCm39	+	Subterm Process	negative regulation of epithelial to mesenchymal transition (synonym: EMT)	3
protein coding gene	MGI:101864	Dag1	dystroglycan 1	9	108082060	108141176	GRCm39	-	Subterm Process	regulation of epithelial to mesenchymal transition (synonym: EMT)	3
protein coding gene	MGI:95283	Edn1	endothelin 1	13	42454952	42461466	GRCm39	+	Subterm Process	neural crest cell fate commitment (synonym: EMT)	3
protein coding gene	MGI:105923	Ednra	endothelin receptor type A	8	78389658	78451081	GRCm39	-	Subterm Process	neural crest cell fate commitment (synonym: EMT)	3
protein coding gene	MGI:103236	Efna1	ephrin A1	3	89179037	89188258	GRCm39	-	Subterm Process	negative regulation of epithelial to mesenchymal transition (synonym: EMT)	3
protein coding gene	MGI:2673679	Ell3	elongation factor RNA polymerase II-like 3	2	121269508	121273082	GRCm39	-	Subterm Process	regulation of epithelial to mesenchymal transition (synonym: EMT)	3
protein coding gene	MGI:1098726	Emp2	epithelial membrane protein 2	16	10099613	10131832	GRCm39	-	Subterm Process	positive regulation of cardiac epithelial to mesenchymal transition (synonym: EMT)	3
protein coding gene	MGI:95392	Eng	endoglin	2	32536607	32572681	GRCm39	+	Subterm Process	epithelial to mesenchymal transition involved in endocardial cushion formation (synonym: EMT)	3
protein coding gene	MGI:1201683	Eomes	eomesodermin	9	118307280	118315200	GRCm39	+	Subterm Process	mesodermal to mesenchymal transition involved in gastrulation (synonym: EMT)	3
protein coding gene	MGI:99612	Epha3	Eph receptor A3	16	63363897	63684538	GRCm39	-	Subterm Process	regulation of epithelial to mesenchymal transition (synonym: EMT)	3
protein coding gene	MGI:98277	Epha4	Eph receptor A4	1	77343822	77491725	GRCm39	-	Subterm Process	negative regulation of epithelial to mesenchymal transition (synonym: EMT)	3
protein coding gene	MGI:95415	Erg	ETS transcription factor	16	95160028	95387452	GRCm39	-	Subterm Process	endocardial cushion to mesenchymal transition involved in heart valve formation (synonym: EMT)	3
protein coding gene	MGI:107940	Ezh2	enhancer of zeste 2 polycomb repressive complex 2 subunit	6	47507208	47572309	GRCm39	-	Subterm Process	positive regulation of epithelial to mesenchymal transition (synonym: EMT)	3
protein coding gene	MGI:2385001	Fermt2	fermitin family member 2	14	45696252	45767575	GRCm39	-	Subterm Process	positive regulation of epithelial to mesenchymal transition (synonym: EMT)	3
protein coding gene	MGI:99604	Fgf8	fibroblast growth factor 8	19	45725237	45731354	GRCm39	-	Subterm Process	epithelial to mesenchymal transition involved in endocardial cushion formation (synonym: EMT)	3
protein coding gene	MGI:1347472	Foxa1	forkhead box A1	12	57587414	57593702	GRCm39	-	Subterm Process	negative regulation of epithelial to mesenchymal transition (synonym: EMT)	3
protein coding gene	MGI:1347476	Foxa2	forkhead box A2	2	147884797	147888889	GRCm39	-	Subterm Process	negative regulation of epithelial to mesenchymal transition (synonym: EMT)	3
protein coding gene	MGI:1347466	Foxc1	forkhead box C1	13	31990629	31994618	GRCm39	+	Subterm Process	positive regulation of epithelial to mesenchymal transition (synonym: EMT)	3
protein coding gene	MGI:1917550	Fuz	fuzzy planar cell polarity protein	7	44544902	44550048	GRCm39	+	Subterm Process	negative regulation of neural crest formation (synonym: EMT)	3
protein coding gene	MGI:95663	Gata3	GATA binding protein 3	2	9861889	9892762	GRCm39	-	Subterm Process	negative regulation of epithelial to mesenchymal transition (synonym: EMT)	3
protein coding gene	MGI:1100870	Gcnt2	glucosaminyl (N-acetyl) transferase 2, I-branching enzyme	13	41013244	41114368	GRCm39	+	Subterm Process	positive regulation of epithelial to mesenchymal transition (synonym: EMT)	3
protein coding gene	MGI:95713	Gja1	gap junction protein, alpha 1	10	56253297	56266519	GRCm39	+	Subterm Process	epicardial cell to mesenchymal cell transition (synonym: EMT)	3
protein coding gene	MGI:1917770	Glipr2	GLI pathogenesis-related 2	4	43957702	43979118	GRCm39	+	Subterm Process	positive regulation of epithelial to mesenchymal transition (synonym: EMT)	3
protein coding gene	MGI:1344337	Grem1	gremlin 1, DAN family BMP antagonist	2	113579020	113588993	GRCm39	-	Subterm Process	regulation of epithelial to mesenchymal transition (synonym: EMT)	3
protein coding gene	MGI:95841	Gsc	goosecoid homeobox	12	104437468	104439495	GRCm39	-	Subterm Process	neural crest cell fate specification (synonym: EMT)	3
protein coding gene	MGI:107821	Has2	hyaluronan synthase 2	15	56529023	56557935	GRCm39	-	Subterm Process	endocardial cushion to mesenchymal transition (synonym: EMT)	3
protein coding gene	MGI:1097691	Hdac2	histone deacetylase 2	10	36850540	36877885	GRCm39	+	Subterm Process	positive regulation of epithelial to mesenchymal transition (synonym: EMT)	3
protein coding gene	MGI:1341800	Hey1	hairy/enhancer-of-split related with YRPW motif 1	3	8728419	8732098	GRCm39	-	Subterm Process	cardiac epithelial to mesenchymal transition (synonym: EMT)	3
protein coding gene	MGI:1341884	Hey2	hairy/enhancer-of-split related with YRPW motif 2	10	30708355	30718779	GRCm39	-	Subterm Process	cardiac epithelial to mesenchymal transition (synonym: EMT)	3
protein coding gene	MGI:1860511	Heyl	hairy/enhancer-of-split related with YRPW motif-like	4	123127349	123143663	GRCm39	+	Subterm Process	cardiac epithelial to mesenchymal transition (synonym: EMT)	3
protein coding gene	MGI:1196620	Hpn	hepsin	7	30798150	30814715	GRCm39	-	Subterm Process	negative regulation of epithelial to mesenchymal transition (synonym: EMT)	3
protein coding gene	MGI:96543	Il1b	interleukin 1 beta	2	129206490	129213059	GRCm39	-	Subterm Process	positive regulation of epithelial to mesenchymal transition (synonym: EMT)	3
protein coding gene	MGI:96559	Il6	interleukin 6	5	30218112	30224973	GRCm39	+	Subterm Process	positive regulation of epithelial to mesenchymal transition (synonym: EMT)	3
protein coding gene	MGI:2159727	Il17rd	interleukin 17 receptor D	14	26760921	26829243	GRCm39	+	Subterm Process	negative regulation of epithelial to mesenchymal transition (synonym: EMT)	3
protein coding gene	MGI:101791	Isl1	ISL1 transcription factor, LIM/homeodomain	13	116434817	116446225	GRCm39	-	Subterm Process	positive regulation of epithelial to mesenchymal transition (synonym: EMT)	3
protein coding gene	MGI:1095416	Jag1	jagged 1	2	136923371	136958440	GRCm39	-	Subterm Process	positive regulation of cardiac epithelial to mesenchymal transition (synonym: EMT)	3
protein coding gene	MGI:2661430	Kbtbd8	kelch repeat and BTB (POZ) domain containing 8	6	95094861	95106774	GRCm39	+	Subterm Process	neural crest formation (synonym: EMT)	3
protein coding gene	MGI:2385619	Klhl12	kelch-like 12	1	134383240	134418618	GRCm39	+	Subterm Process	neural crest formation (synonym: EMT)	3
protein coding gene	MGI:1277150	Ldlrad4	low density lipoprotein receptor class A domain containing 4	18	68065345	68393621	GRCm39	+	Subterm Process	negative regulation of epithelial to mesenchymal transition (synonym: EMT)	3
protein coding gene	MGI:96770	Lef1	lymphoid enhancer binding factor 1	3	130904120	131018005	GRCm39	+	Subterm Process	positive regulation of epithelial to mesenchymal transition (synonym: EMT)	3
protein coding gene	MGI:2137913	Loxl2	lysyl oxidase-like 2	14	69846517	69933283	GRCm39	+	Subterm Process	positive regulation of epithelial to mesenchymal transition (synonym: EMT)	3
protein coding gene	MGI:1924155	Lrg1	leucine-rich alpha-2-glycoprotein 1	17	56426678	56428946	GRCm39	-	Subterm Process	positive regulation of epithelial to mesenchymal transition (synonym: EMT)	3
protein coding gene	MGI:1298218	Lrp6	low density lipoprotein receptor-related protein 6	6	134423439	134543876	GRCm39	-	Subterm Process	neural crest formation (synonym: EMT)	3
protein coding gene	MGI:1919140	Mad2l2	MAD2 mitotic arrest deficient-like 2	4	148214841	148230156	GRCm39	+	Subterm Process	positive regulation of epithelial to mesenchymal transition (synonym: EMT)	3
protein coding gene	MGI:2664902	Mark1	MAP/microtubule affinity regulating kinase 1	1	184628986	184731767	GRCm39	-	Subterm Process	negative regulation of epithelial to mesenchymal transition (synonym: EMT)	3
protein coding gene	MGI:2384752	Mcrip1	MAPK regulated corepressor interacting protein 1	11	120433714	120440553	GRCm39	-	Subterm Process	regulation of epithelial to mesenchymal transition (synonym: EMT)	3
protein coding gene	MGI:96949	Mdk	midkine	2	91760150	91762642	GRCm39	-	Subterm Process	positive regulation of epithelial to mesenchymal transition (synonym: EMT)	3
protein coding gene	MGI:97169	Msx2	msh homeobox 2	13	53620917	53626816	GRCm39	-	Subterm Process	epithelial to mesenchymal transition involved in endocardial cushion formation (synonym: EMT)	3
protein coding gene	MGI:1928394	Mtor	mechanistic target of rapamycin kinase	4	148533068	148642140	GRCm39	+	Subterm Process	positive regulation of epithelial to mesenchymal transition (synonym: EMT)	3
protein coding gene	MGI:2137495	Myocd	myocardin	11	65067387	65160815	GRCm39	-	Subterm Process	positive regulation of epithelial to mesenchymal transition (synonym: EMT)	3
protein coding gene	MGI:108067	Nkx2-1	NK2 homeobox 1	12	56578743	56583693	GRCm39	-	Subterm Process	negative regulation of epithelial to mesenchymal transition (synonym: EMT)	3
protein coding gene	MGI:104327	Nog	noggin	11	89191464	89193158	GRCm39	-	Subterm Process	negative regulation of epithelial to mesenchymal transition involved in endocardial cushion formation (synonym: EMT)	3
protein coding gene	MGI:1918019	Nolc1	nucleolar and coiled-body phosphoprotein 1	19	46064302	46073969	GRCm39	+	Subterm Process	neural crest formation (synonym: EMT)	3
protein coding gene	MGI:1338039	Ovol2	ovo like zinc finger 2	2	144147095	144174000	GRCm39	-	Subterm Process	negative regulation of epithelial to mesenchymal transition (synonym: EMT)	3
protein coding gene	MGI:2149961	Pawr	PRKC, apoptosis, WT1, regulator	10	108167982	108250101	GRCm39	+	Subterm Process	negative regulation of epithelial to mesenchymal transition (synonym: EMT)	3
protein coding gene	MGI:107490	Pdcd4	programmed cell death 4	19	53880662	53918291	GRCm39	+	Subterm Process	epithelial to mesenchymal transition involved in cardiac fibroblast development (synonym: EMT)	3
protein coding gene	MGI:109283	Pdcd6	programmed cell death 6	13	74451628	74465699	GRCm39	-	Subterm Process	neural crest formation (synonym: EMT)	3
protein coding gene	MGI:103098	Pdpn	podoplanin	4	142994001	143026134	GRCm39	-	Subterm Process	positive regulation of epithelial to mesenchymal transition (synonym: EMT)	3
protein coding gene	MGI:1915148	Pef1	penta-EF hand domain containing 1	4	130001349	130021927	GRCm39	+	Subterm Process	neural crest formation (synonym: EMT)	3
protein coding gene	MGI:2143230	Phldb1	pleckstrin homology like domain, family B, member 1	9	44597601	44646495	GRCm39	-	Subterm Process	regulation of epithelial to mesenchymal transition (synonym: EMT)	3
protein coding gene	MGI:2444981	Phldb2	pleckstrin homology like domain, family B, member 2	16	45566606	45773961	GRCm39	-	Subterm Process	regulation of epithelial to mesenchymal transition (synonym: EMT)	3
protein coding gene	MGI:1916863	Pofut2	protein O-fucosyltransferase 2	10	77095052	77105409	GRCm39	+	Subterm Process	regulation of epithelial to mesenchymal transition (synonym: EMT)	3
protein coding gene	MGI:1321159	Ppp2ca	protein phosphatase 2 (formerly 2A), catalytic subunit, alpha isoform	11	51989651	52013576	GRCm39	+	Subterm Process	negative regulation of epithelial to mesenchymal transition (synonym: EMT)	3
protein coding gene	MGI:109583	Pten	phosphatase and tensin homolog	19	32734977	32803560	GRCm39	+	Subterm Process	negative regulation of epithelial to mesenchymal transition (synonym: EMT)	3
protein coding gene	MGI:95481	Ptk2	PTK2 protein tyrosine kinase 2	15	73076951	73295129	GRCm39	-	Subterm Process	positive regulation of epithelial to mesenchymal transition (synonym: EMT)	3
protein coding gene	MGI:1913464	Rgcc	regulator of cell cycle	14	79526190	79539075	GRCm39	-	Subterm Process	positive regulation of epithelial to mesenchymal transition (synonym: EMT)	3
protein coding gene	MGI:1915835	Rtn4	reticulon 4	11	29642947	29694331	GRCm39	+	Subterm Process	cardiac epithelial to mesenchymal transition (synonym: EMT)	3
protein coding gene	MGI:1337026	Sdcbp	syndecan binding protein	4	6365654	6396122	GRCm39	+	Subterm Process	positive regulation of epithelial to mesenchymal transition (synonym: EMT)	3
protein coding gene	MGI:892014	Sfrp1	secreted frizzled-related protein 1	8	23901518	23939648	GRCm39	+	Subterm Process	negative regulation of epithelial to mesenchymal transition (synonym: EMT)	3
protein coding gene	MGI:108078	Sfrp2	secreted frizzled-related protein 2	3	83673628	83681621	GRCm39	+	Subterm Process	negative regulation of epithelial to mesenchymal transition (synonym: EMT)	3
protein coding gene	MGI:108051	Smad2	SMAD family member 2	18	76374651	76444034	GRCm39	+	Subterm Process	positive regulation of epithelial to mesenchymal transition (synonym: EMT)	3
protein coding gene	MGI:1201674	Smad3	SMAD family member 3	9	63554049	63665276	GRCm39	-	Subterm Process	positive regulation of epithelial to mesenchymal transition (synonym: EMT)	3
protein coding gene	MGI:894293	Smad4	SMAD family member 4	18	73772080	73836851	GRCm39	-	Subterm Process	epithelial to mesenchymal transition involved in endocardial cushion formation (synonym: EMT)	3
protein coding gene	MGI:1100518	Smad7	SMAD family member 7	18	75500600	75529006	GRCm39	+	Subterm Process	regulation of epithelial to mesenchymal transition (synonym: EMT)	3
protein coding gene	MGI:2150016	Spred1	sprouty protein with EVH-1 domain 1, related sequence	2	116951855	117012760	GRCm39	+	Subterm Process	negative regulation of epithelial to mesenchymal transition (synonym: EMT)	3
protein coding gene	MGI:2150019	Spred2	sprouty-related EVH1 domain containing 2	11	19874442	19974026	GRCm39	+	Subterm Process	negative regulation of epithelial to mesenchymal transition (synonym: EMT)	3
protein coding gene	MGI:2142186	Spred3	sprouty-related EVH1 domain containing 3	7	28858254	28869836	GRCm39	-	Subterm Process	negative regulation of epithelial to mesenchymal transition (synonym: EMT)	3
protein coding gene	MGI:1345139	Spry1	sprouty RTK signaling antagonist 1	3	37694096	37698747	GRCm39	+	Subterm Process	negative regulation of epithelial to mesenchymal transition (synonym: EMT)	3
protein coding gene	MGI:1345138	Spry2	sprouty RTK signaling antagonist 2	14	106129381	106134253	GRCm39	-	Subterm Process	negative regulation of epithelial to mesenchymal transition (synonym: EMT)	3
protein coding gene	MGI:1921694	Tasor	transcription activation suppressor	14	27150791	27205512	GRCm39	+	Subterm Process	mesodermal to mesenchymal transition involved in gastrulation (synonym: EMT)	3
protein coding gene	MGI:98495	Tbx3	T-box 3	5	119808734	119822789	GRCm39	+	Subterm Process	cardiac epithelial to mesenchymal transition (synonym: EMT)	3
protein coding gene	MGI:1888496	Tbx20	T-box 20	9	24632108	24685599	GRCm39	-	Subterm Process	regulation of epithelial to mesenchymal transition (synonym: EMT)	3
protein coding gene	MGI:1202879	Tcf7l2	transcription factor 7 like 2, T cell specific, HMG box	19	55730252	55922086	GRCm39	+	Subterm Process	canonical Wnt signaling pathway involved in positive regulation of epithelial to mesenchymal transition (synonym: EMT)	3
protein coding gene	MGI:892003	Tcof1	treacle ribosome biogenesis factor 1	18	60946827	60982043	GRCm39	-	Subterm Process	neural crest formation (synonym: EMT)	3
protein coding gene	MGI:102784	Tgfb1i1	transforming growth factor beta 1 induced transcript 1	7	127845984	127854871	GRCm39	+	Subterm Process	positive regulation of epithelial to mesenchymal transition (synonym: EMT)	3
protein coding gene	MGI:98726	Tgfb2	transforming growth factor, beta 2	1	186354989	186438186	GRCm39	-	Subterm Process	negative regulation of epithelial to mesenchymal transition involved in endocardial cushion formation (synonym: EMT)	3
protein coding gene	MGI:98727	Tgfb3	transforming growth factor, beta 3	12	86103519	86125815	GRCm39	-	Subterm Process	positive regulation of epithelial to mesenchymal transition (synonym: EMT)	3
protein coding gene	MGI:98728	Tgfbr1	transforming growth factor, beta receptor I	4	47353222	47414926	GRCm39	+	Subterm Process	positive regulation of epithelial to mesenchymal transition involved in endocardial cushion formation (synonym: EMT)	3
protein coding gene	MGI:98729	Tgfbr2	transforming growth factor, beta receptor II	9	115916763	116004431	GRCm39	-	Subterm Process	positive regulation of epithelial to mesenchymal transition involved in endocardial cushion formation (synonym: EMT)	3
protein coding gene	MGI:103306	Tiam1	T cell lymphoma invasion and metastasis 1	16	89583999	89940657	GRCm39	-	Subterm Process	regulation of epithelial to mesenchymal transition (synonym: EMT)	3
protein coding gene	MGI:1915138	Tmem100	transmembrane protein 100	11	89921174	89927334	GRCm39	+	Subterm Process	epithelial to mesenchymal transition involved in endocardial cushion formation (synonym: EMT)	3
protein coding gene	MGI:1914775	Trim62	tripartite motif-containing 62	4	128777837	128805119	GRCm39	+	Subterm Process	negative regulation of epithelial to mesenchymal transition (synonym: EMT)	3
protein coding gene	MGI:102548	Tsc2	TSC complex subunit 2	17	24814790	24851604	GRCm39	-	Subterm Process	negative regulation of epithelial to mesenchymal transition (synonym: EMT)	3
protein coding gene	MGI:98872	Twist1	twist basic helix-loop-helix transcription factor 1	12	34007670	34009828	GRCm39	+	Subterm Process	positive regulation of epithelial to mesenchymal transition (synonym: EMT)	3
protein coding gene	MGI:2685454	Usf3	upstream transcription factor family member 3	16	43993609	44047828	GRCm39	+	Subterm Process	negative regulation of epithelial to mesenchymal transition (synonym: EMT)	3
protein coding gene	MGI:2135272	Vangl2	VANGL planar cell polarity 2	1	171828527	171856011	GRCm39	-	Subterm Process	epicardial cell to mesenchymal cell transition (synonym: EMT)	3
protein coding gene	MGI:2177651	Vasn	vasorin	16	4457805	4468666	GRCm39	+	Subterm Process	negative regulation of epithelial to mesenchymal transition (synonym: EMT)	3
protein coding gene	MGI:103178	Vegfa	vascular endothelial growth factor A	17	46327919	46343295	GRCm39	-	Subterm Process	negative regulation of epithelial to mesenchymal transition (synonym: EMT)	3
protein coding gene	MGI:98954	Wnt2	wingless-type MMTV integration site family, member 2	6	17988939	18030584	GRCm39	-	Subterm Process	cardiac epithelial to mesenchymal transition (synonym: EMT)	3
protein coding gene	MGI:98958	Wnt5a	wingless-type MMTV integration site family, member 5A	14	28226707	28249405	GRCm39	+	Subterm Process	mesodermal to mesenchymal transition involved in gastrulation (synonym: EMT)	3
protein coding gene	MGI:2136018	Wnt16	wingless-type MMTV integration site family, member 16	6	22288226	22298521	GRCm39	+	Subterm Process	cardiac epithelial to mesenchymal transition (synonym: EMT)	3
protein coding gene	MGI:1917649	Wwtr1	WW domain containing transcription regulator 1	3	57363070	57483331	GRCm39	-	Subterm Process	positive regulation of epithelial to mesenchymal transition (synonym: EMT)	3
protein coding gene	MGI:2662729	Zfp703	zinc finger protein 703	8	27467364	27471490	GRCm39	+	Subterm Process	positive regulation of epithelial to mesenchymal transition (synonym: EMT)	3
protein coding gene	MGI:2442210	Zfp750	zinc finger protein 750	11	121401804	121410159	GRCm39	-	Subterm Process	negative regulation of epithelial to mesenchymal transition (synonym: EMT)	3
